# Supplementary material
Source: publisher figshare collection journal article supplement (https://gsajournals.figshare.com/ndownloader/files/23994305)
Supplement: Supplementary file 1 [file 23994305]

## Sheet: Chandler_genetic_map
ID	Genotype	AX.170672536	AX.170672618	AX.171488685	AX.170609628	AX.170683936	AX.170857872	AX.170858497	AX.170859113	AX.170617342	AX.170583548	AX.171035795	AX.171037998	AX.171135995	AX.170601260	AX.171143060	AX.171143200	AX.170560846	AX.170768834	AX.170761013	AX.170761067	AX.170989651	AX.171202397	AX.170925229	AX.170925321	AX.170925389	AX.170925456	AX.170927282	AX.170888363	AX.170596032	AX.171129276	AX.171032037	AX.170731685	AX.170731676	AX.171500254	AX.171065016	AX.170721227	AX.171168214	AX.170605606	AX.170605673	AX.170605749	AX.170585045	AX.170956195	AX.170680197	AX.170762956	AX.170660300	AX.170660292	AX.170834557	AX.171133505
		1	1	1	1	1	1	1	1	1	1	1	1	1	1	1	1	1	1	1	1	1	1	1	1	1	1	1	1	1	1	1	1	1	1	1	1	1	1	1	1	1	1	1	1	1	1	1	1
		0	0.588809	1.18762	1.78643	2.38524	4.18899	4.78774	5.38655	5.98536	6.58417	7.18298	7.78179	8.3806	8.97941	9.57822	10.177	10.7755	15.1268	16.3314	16.9297	22.5972	23.1955	23.7943	24.3931	24.9919	25.5905	28.6593	31.0989	31.6975	32.9025	33.5012	34.1	34.6987	37.1386	37.7372	38.336	38.9348	39.5336	40.1324	40.7312	41.936	44.3758	44.9745	45.5733	46.1721	46.7709	47.3697	47.9685
07-033-14	a550817.4325015.052018.683_A06.CEL	AB	AB	AB	AB	AB	AB	AB	AB	AB	AB	AB	AB	AB	AB	AB	AB	AB	AB	AB	AB	AB	AB	AB	AB	AB	AB	AB	AB	AB	AB	AB	AB	AB	AB	AB	AB	AB	AB	AB	AB	AB	AB	AB	AB	AB	AB	AB	AB
07-033-6	a550817.4325015.052018.683_A07.CEL	AA	AA	AA	AA	AA	AA	AA	AA	AA	AA	AA	AA	AA	AA	AA	AA	AA	AA	AA	AA	AA	AA	AA	AA	AA	AA	AA	AA	AA	AA	AA	AA	AA	AA	AA	AA	AA	AA	AA	AA	AA	AA	AA	AA	AA	AA	AA	AA
06-033-104	a550817.4325015.052018.683_A08.CEL	AB	AB	AB	AB	AB	AB	AB	AB	AB	AB	AB	AB	AB	AA	AA	AA	AA	AA	AA	AA	AA	AA	AA	AA	AA	AA	AA	AA	AA	AA	AA	AA	AA	AA	AA	AA	AA	AA	AA	AA	AA	AA	AA	AA	AA	AA	AA	AA
06-033-95	a550817.4325015.052018.683_A09.CEL	AB	AB	AA	AA	AA	AA	AA	AA	AA	AA	AA	AA	AA	AA	AA	AA	AA	AA	AA	AA	AA	AA	AA	AA	AA	AA	AA	AA	AA	AA	AA	AA	AA	AA	AA	AA	AA	AA	AA	AA	AA	AA	AA	AA	AA	AA	AA	AA
07-033-99	a550817.4325015.052018.683_B03.CEL	AA	AA	AA	AA	AA	AA	AA	AA	AA	AA	AA	AA	AA	AA	AA	AA	AA	AA	AA	AA	AA	AA	AA	AA	AA	AA	AA	AA	AA	AA	AA	AA	AA	AA	AA	AA	AA	AA	AA	AA	AA	AA	AA	AA	AA	AA	AA	AA
07-033-106	a550817.4325015.052018.683_B05.CEL	AB	AB	AB	AB	AB	AB	AB	AB	AB	AB	AB	AB	AB	AB	AB	AB	AB	AB	AB	AB	AB	AB	AB	AB	AB	AB	AB	AB	AB	AB	AB	AB	AB	AB	AB	AB	AB	AB	AB	AB	AB	AB	AB	AB	AB	AB	AB	AB
07-033-110	a550817.4325015.052018.683_B07.CEL	AB	AB	AB	AB	AB	AB	AB	AB	AB	AB	AB	AB	AB	AB	AB	AB	AB	AB	AB	AB	AB	AB	AB	AB	AB	AB	AB	AB	AB	AB	AB	AB	AB	AB	AB	AB	AB	AB	AB	AB	AB	AB	AB	AB	AB	AB	AB	AB
07-033-109	a550817.4325015.052018.683_B08.CEL	AA	AA	AA	AA	AA	AA	AA	AA	AA	AA	AA	AA	AA	AA	AA	AA	AA	AA	AA	AA	AA	AA	AA	AA	AA	AA	AA	AA	AA	AA	AA	AA	AA	AA	AA	AA	AA	AA	AA	AA	AA	AA	AA	AA	AA	AA	AA	AA
07-033-108	a550817.4325015.052018.683_B10.CEL	AA	AA	AA	AA	AA	AA	AA	AA	AA	AA	AA	AA	AA	AA	AA	AA	AA	AA	AA	AA	AA	AA	AA	AA	AA	AA	AA	AA	AA	AA	AA	AA	AA	AA	AA	AA	AA	AA	AA	AA	AA	AA	AA	AA	AA	AA	AA	AA
07-033-107	a550817.4325015.052018.683_B11.CEL	AA	AA	AA	AA	AA	AA	AA	AA	AA	AA	AA	AA	AA	AA	AA	AA	AA	AA	AA	AA	AA	AA	AA	AA	AA	AA	AA	AA	AA	AA	AA	AA	AA	AB	AB	AB	AB	AB	AB	AB	AB	AB	AB	AB	AB	AB	AB	AB
07-033-96	a550817.4325015.052018.683_C02.CEL	AB	AB	AB	AB	AB	AB	AB	AB	AB	AB	AB	AB	AB	AB	AB	AB	AB	AB	AB	AB	AB	AB	AB	AB	AB	AB	AB	AA	AA	AA	AA	AA	AA	AA	AA	AA	AA	AA	AA	AA	AA	AA	AA	AA	AA	AA	AA	AA
07-033-105	a550817.4325015.052018.683_C04.CEL	AA	AA	AA	AA	AA	AA	AA	AA	AA	AA	AA	AA	AA	AA	AA	AA	AA	AA	AA	AA	AA	AA	AA	AA	AA	AA	AB	AB	AB	AB	AB	AB	AB	AB	AB	AB	AB	AB	AB	AB	AB	AB	AB	AB	AB	AB	AB	AB
07-033-94	a550817.4325015.052018.683_C05.CEL	AB	AB	AB	AB	AB	AB	AB	AB	AB	AB	AB	AB	AB	AB	AB	AB	AB	AB	AB	AB	AB	AB	AB	AB	AB	AB	AB	AB	AB	AB	AB	AB	AB	AB	AB	AB	AB	AB	AB	AB	AB	AB	AB	AB	AB	AB	AB	AB
07-033-112	a550817.4325015.052018.683_D01.CEL	AA	AA	AA	AA	AA	AA	AA	AA	AA	AA	AA	AA	AA	AA	AA	AA	AA	AA	AA	AA	AA	AA	AA	AA	AA	AA	AA	AA	AA	AA	AA	AA	AA	AA	AA	AA	AA	AA	AA	AA	AA	AA	AA	AA	AA	AA	AA	AA
06-033-38	a550817.4325015.052018.684_B06.CEL	AB	AB	AB	AB	AB	AB	AB	AB	AB	AB	AB	AB	AB	AB	AB	AB	AB	AB	AB	AB	AB	AB	AB	AB	AB	AB	AB	AB	AB	AB	AB	AB	AB	AB	AB	AB	AB	AA	AA	AA	AA	AA	AA	AA	AA	AA	AA	AA
06-033-23	a550817.4325015.052018.684_B09.CEL	AA	AA	AA	AA	AA	AA	AA	AA	AA	AA	AA	AA	AA	AA	AA	AA	AA	AA	AA	AA	AA	AA	AA	AA	AA	AA	AA	AA	AA	AA	AA	AA	AA	AA	AA	AA	AA	AA	AA	AA	AA	AA	AA	AA	AA	AA	AA	AA
06-033-3	a550817.4325015.052018.684_B10.CEL	AB	AB	AB	AB	AB	AB	AB	AB	AB	AB	AB	AB	AB	AB	AB	AB	AB	AB	AB	AB	AB	AB	AB	AB	AB	AB	AB	AB	AB	AB	AB	AB	AB	AB	AB	AB	AB	AB	AB	AB	AB	AA	AA	AA	AA	AA	AA	AA
03-002-37	a550817.4325015.052018.684_C03.CEL	AB	AB	AB	AB	AB	AB	AB	AB	AB	AB	AB	AB	AB	AB	AB	AB	AB	AB	AB	AB	AB	AB	AB	AB	AB	AB	AB	AB	AB	AB	AB	AB	AB	AB	AB	AB	AB	AB	AB	AB	AB	AB	AB	AB	AB	AB	AB	AB
03-002-66	a550817.4325015.052018.684_C07.CEL	AB	AB	AB	AB	AB	AB	AB	AB	AB	AB	AB	AB	AB	AB	AB	AB	AB	AB	AB	AB	AA	AA	AA	AA	AA	AA	AA	AA	AA	AA	AA	AA	AA	AA	AA	AA	AA	AA	AA	AA	AA	AA	AA	AA	AA	AA	AA	AA
03-002-39	a550817.4325015.052018.684_C08.CEL	AB	AB	AB	AB	AB	AB	AB	AB	AB	AB	AB	AB	AB	AB	AB	AB	AB	AB	AB	AB	AB	AB	AB	AB	AB	AB	AB	AB	AB	AB	AB	AB	AB	AB	AB	AB	AB	AB	AB	AB	AB	AB	AB	AB	AB	AB	AB	AB
03-002-75	a550817.4325015.052018.684_C09.CEL	AA	AA	AA	AA	AA	AA	AA	AA	AA	AA	AA	AA	AA	AA	AA	AA	AA	AA	AA	AA	AA	AA	AA	AA	AA	AA	AA	AA	AA	AA	AA	AA	AA	AA	AA	AA	AA	AA	AA	AA	AA	AA	AA	AA	AA	AA	AA	AA
03-002-78	a550817.4325015.052018.684_D01.CEL	AB	AB	AB	AB	AB	AB	AB	AB	AB	AB	AB	AB	AB	AB	AB	AB	AB	AB	AB	AB	AB	AB	AB	AB	AB	AB	AB	AB	AB	AB	AB	AB	AB	AB	AB	AB	AB	AB	AB	AB	AB	AB	AB	AB	AB	AB	AB	AB
03-002-4	a550817.4325015.052018.684_D02.CEL	AA	AA	AA	AA	AA	AA	AA	AA	AA	AA	AA	AA	AA	AA	AA	AA	AA	AA	AA	AA	AA	AA	AA	AA	AA	AA	AA	AA	AA	AA	AA	AA	AA	AA	AA	AA	AA	AA	AA	AA	AA	AA	AA	AA	AA	AA	AA	AA
03-002-92	a550817.4325015.052018.684_D03.CEL	AA	AA	AA	AA	AA	AA	AA	AA	AA	AA	AA	AA	AA	AA	AA	AA	AA	AA	AA	AA	AA	AA	AA	AA	AA	AA	AA	AA	AA	AB	AB	AB	AB	AB	AB	AB	AB	AB	AB	AB	AB	AB	AB	AB	AB	AB	AB	AB
07-033-78	a550817.4325015.052018.684_E03.CEL	AA	AA	AA	AA	AA	AA	AA	AA	AA	AA	AA	AA	AA	AA	AA	AA	AA	AA	AA	AA	AA	AA	AA	AA	AA	AA	AA	AA	AA	AA	AA	AA	AA	AA	AA	AA	AA	AA	AA	AA	AA	AA	AA	AA	AA	AA	AA	AA
07-033-20	a550817.4325015.052018.684_E10.CEL	AA	AA	AA	AA	AA	AA	AA	AA	AA	AA	AA	AA	AA	AA	AA	AA	AA	AA	AA	AA	AA	AA	AA	AA	AA	AA	AA	AA	AA	AA	AA	AA	AA	AA	AA	AA	AA	AA	AA	AA	AA	AA	AA	AA	AA	AA	AA	AA
07-033-77	a550817.4325015.052018.684_F01.CEL	AB	AB	AB	AB	AB	AB	AB	AB	AB	AB	AB	AB	AB	AB	AB	AB	AB	AB	AB	AB	AB	AB	AB	AB	AB	AB	AB	AB	AB	AB	AB	AB	AB	AB	AB	AB	AB	AB	AB	AB	AB	AB	AB	AB	AB	AB	AB	AB
07-033-53	a550817.4325015.052018.684_F03.CEL	AB	AB	AB	AB	AB	AB	AB	AB	AB	AB	AB	AB	AB	AB	AB	AB	AB	AB	AB	AB	AB	AB	AB	AB	AB	AB	AB	AB	AB	AB	AB	AB	AB	AB	AB	AB	AB	AB	AB	AB	AB	AB	AB	AB	AB	AB	AB	AB
07-033-11	a550817.4325015.052018.684_F07.CEL	AA	AA	AA	AA	AA	AA	AA	AA	AA	AA	AA	AA	AA	AA	AA	AA	AA	AA	AB	AB	AB	AB	AB	AB	AB	AB	AB	AB	AB	AB	AB	AB	AB	AB	AB	AB	AB	AB	AB	AB	AB	AB	AB	AB	AB	AB	AB	AB
07-033-3	a550817.4325015.052018.684_F08.CEL	AB	AB	AB	AB	AB	AB	AB	AB	AB	AB	AB	AB	AB	AB	AB	AB	AB	AB	AB	AB	AB	AB	AB	AB	AB	AB	AB	AB	AB	AB	AB	AB	AB	AB	AB	AB	AB	AB	AB	AB	AB	AB	AB	AB	AB	AB	AB	AB
07-033-76	a550817.4325015.052018.684_F11.CEL	AB	AB	AB	AB	AB	AB	AB	AB	AB	AB	AB	AB	AB	AB	AB	AB	AB	AB	AB	AB	AA	AA	AA	AA	AA	AA	AA	AA	AA	AA	AA	AA	AA	AA	AA	AA	AA	AA	AA	AA	AA	AA	AA	AA	AA	AA	AA	AA
07-033-67	a550817.4325015.052018.684_G04.CEL	AB	AA	AA	AA	AA	AA	AA	AA	AA	AA	AA	AA	AA	AA	AA	AA	AA	AA	AA	AA	AA	AA	AA	AA	AA	AA	AA	AA	AA	AA	AA	AA	AA	AA	AA	AA	AA	AA	AA	AA	AA	AA	AA	AA	AA	AA	AA	AA
07-033-82	a550817.4325015.052018.684_G08.CEL	AA	AA	AA	AA	AA	AA	AA	AA	AA	AA	AA	AA	AA	AA	AA	AA	AA	AA	AA	AA	AA	AA	AA	AA	AA	AA	AA	AA	AA	AA	AA	AA	AA	AA	AA	AA	AA	AA	AA	AA	AA	AA	AA	AA	AA	AA	AA	AA
07-033-16	a550817.4325015.052018.684_H01.CEL	AB	AB	AB	AB	AB	AB	AB	AB	AB	AB	AB	AB	AB	AB	AB	AB	AB	AB	AB	AB	AB	AB	AB	AB	AB	AB	AB	AB	AB	AB	AB	AB	AB	AB	AB	AB	AB	AB	AB	AB	AB	AB	AB	AB	AB	AB	AB	AB
06-033-105	a550817.4325015.052018.684_H10.CEL	AA	AA	AA	AA	AA	AA	AA	AA	AA	AA	AA	AA	AA	AA	AA	AA	AA	AA	AA	AA	AA	AA	AA	AA	AA	AA	AA	AA	AA	AA	AA	AA	AA	AA	AA	AA	AA	AA	AA	AA	AA	AA	AA	AA	AA	AB	AB	AB
06-033-96	a550817.4325015.052018.684_H11.CEL	AB	AB	AB	AB	AB	AB	AB	AB	AB	AB	AB	AB	AB	AB	AB	AB	AB	AB	AB	AB	AB	AB	AB	AB	AB	AB	AB	AB	AB	AB	AB	AB	AB	AB	AB	AB	AB	AB	AB	AB	AB	AB	AB	AB	AB	AB	AB	AB
07-033-80	a550817.4325015.052018.684_H12.CEL	AA	AA	AA	AA	AA	AA	AA	AA	AA	AA	AA	AA	AA	AA	AA	AA	AA	AA	AA	AA	AB	AB	AB	AB	AB	AB	AB	AB	AB	AB	AB	AB	AB	AB	AB	AB	AB	AB	AB	AB	AB	AB	AB	AB	AB	AB	AB	AB
06-033-48	a550817.4325015.052018.686_A02.CEL	AB	AB	AB	AB	AB	AB	AB	AB	AB	AB	AB	AB	AB	AB	AB	AB	AB	AA	AA	AA	AA	AA	AA	AA	AA	AA	AB	AB	AB	AB	AB	AB	AB	AB	AB	AB	AB	AB	AB	AB	AB	AB	AB	AB	AB	AB	AB	AB
06-033-56	a550817.4325015.052018.686_A03.CEL	AB	AB	AB	AB	AB	AB	AB	AB	AB	AB	AB	AB	AB	AB	AB	AB	AB	AB	AB	AB	AB	AB	AB	AB	AB	AB	AB	AB	AB	AB	AB	AB	AB	AB	AB	AB	AB	AB	AB	AA	AA	AA	AA	AA	AA	AA	AA	AA
06-033-81	a550817.4325015.052018.686_A05.CEL	AB	AB	AB	AB	AB	AB	AB	AB	AB	AB	AB	AB	AB	AB	AB	AB	AB	AB	AB	AB	AB	AB	AB	AB	AB	AB	AB	AB	AB	AB	AB	AB	AB	AB	AB	AB	AB	AB	AB	AB	AB	AB	AB	AB	AB	AB	AB	AB
06-033-89	a550817.4325015.052018.686_A06.CEL	AA	AA	AA	AA	AA	AA	AA	AA	AA	AA	AA	AA	AA	AA	AA	AA	AA	AA	AA	AA	AA	AA	AA	AA	AA	AA	AA	AA	AA	AA	AA	AA	AA	AA	AA	AA	AA	AA	AA	AA	AA	AA	AA	AA	AA	AA	AA	AA
06-033-1	a550817.4325015.052018.686_A07.CEL	AA	AA	AA	AA	AA	AA	AA	AA	AA	AA	AA	AA	AA	AA	AA	AA	AA	AA	AA	AA	AA	AA	AA	AA	AA	AA	AA	AA	AA	AA	AA	AA	AA	AA	AA	AA	AA	AA	AA	AA	AA	AA	AA	AA	AA	AA	AA	AA
06-033-9	a550817.4325015.052018.686_A08.CEL	AB	AB	AB	AB	AB	AB	AB	AB	AB	AB	AB	AB	AB	AB	AB	AB	AB	AB	AB	AB	AB	AB	AB	AB	AB	AB	AB	AB	AB	AB	AB	AB	AB	AB	AA	AA	AA	AA	AA	AA	AA	AA	AA	AA	AA	AA	AA	AA
06-033-25	a550817.4325015.052018.686_A09.CEL	AA	AA	AA	AA	AA	AA	AA	AA	AA	AA	AA	AA	AA	AA	AA	AA	AA	AA	AA	AA	AA	AA	AA	AA	AA	AA	AB	AB	AB	AB	AB	AB	AB	AB	AB	AB	AB	AB	AB	AB	AB	AB	AB	AB	AB	AB	AB	AB
06-033-41	a550817.4325015.052018.686_A10.CEL	AA	AA	AA	AA	AA	AA	AA	AA	AA	AA	AA	AA	AA	AA	AA	AA	AA	AA	AA	AA	AA	AA	AA	AA	AA	AA	AA	AA	AA	AA	AA	AA	AA	AA	AA	AA	AA	AA	AA	AA	AA	AA	AA	AA	AA	AA	AA	AA
06-033-49	a550817.4325015.052018.686_A11.CEL	AB	AB	AB	AB	AB	AB	AB	AB	AB	AB	AB	AB	AB	AB	AB	AB	AB	AB	AB	AB	AB	AB	AB	AB	AB	AB	AB	AB	AB	AB	AB	AB	AB	AB	AB	AB	AB	AB	AB	AB	AB	AB	AB	AB	AB	AB	AB	AB
06-033-73	a550817.4325015.052018.686_B01.CEL	AA	AA	AA	AA	AA	AA	AA	AA	AA	AA	AA	AA	AA	AA	AA	AA	AA	AA	AA	AA	AA	AA	AA	AA	AA	AA	AA	AA	AA	AA	AA	AA	AA	AA	AA	AA	AA	AA	AA	AA	AA	AA	AA	AA	AA	AA	AA	AA
06-033-10	a550817.4325015.052018.686_B02.CEL	AB	AB	AB	AB	AB	AB	AB	AB	AB	AB	AB	AB	AB	AB	AB	AB	AB	AB	AB	AB	AB	AB	AB	AB	AB	AB	AB	AB	AB	AB	AB	AB	AB	AB	AB	AB	AB	AB	AB	AB	AB	AB	AB	AB	AB	AB	AB	AB
06-033-58	a550817.4325015.052018.686_B03.CEL	AA	AA	AA	AA	AA	AA	AA	AA	AA	AA	AA	AA	AA	AA	AA	AA	AA	AA	AA	AA	AA	AA	AA	AA	AA	AA	AA	AA	AA	AA	AA	AA	AA	AA	AA	AA	AA	AA	AA	AA	AA	AA	AA	AA	AA	AA	AA	AA
06-033-83	a550817.4325015.052018.686_B05.CEL	AA	AA	AA	AA	AA	AA	AA	AA	AA	AA	AA	AA	AA	AA	AA	AA	AA	AA	AA	AA	AA	AA	AA	AA	AA	AA	AA	AA	AA	AA	AA	AA	AA	AA	AA	AA	AA	AA	AA	AA	AA	AA	AA	AA	AA	AA	AA	AA
06-033-51	a550817.4325015.052018.686_B08.CEL	AA	AA	AA	AA	AA	AA	AA	AA	AA	AA	AA	AA	AA	AA	AA	AA	AA	AA	AA	AA	AA	AA	AA	AA	AA	AA	AA	AA	AA	AA	AA	AA	AA	AA	AA	AA	AA	AA	AA	AA	AA	AA	AA	AA	AA	AA	AA	AA
06-033-75	a550817.4325015.052018.686_B10.CEL	AA	AA	AA	AA	AA	AA	AA	AA	AA	AA	AA	AA	AA	AA	AA	AA	AA	AA	AA	AA	AA	AA	AA	AA	AA	AA	AA	AA	AA	AA	AA	AA	AA	AA	AA	AA	AA	AA	AA	AA	AA	AA	AA	AA	AA	AA	AA	AA
06-033-4	a550817.4325015.052018.686_B12.CEL	AB	AB	AB	AB	AB	AB	AB	AB	AB	AB	AB	AB	AB	AB	AB	AB	AB	AB	AB	AB	AA	AA	AA	AA	AA	AA	AA	AA	AA	AA	AA	AA	AA	AA	AA	AA	AA	AA	AA	AA	AA	AA	AA	AA	AA	AA	AA	AA
06-033-12	a550817.4325015.052018.686_C01.CEL	AB	AB	AB	AB	AB	AB	AB	AB	AB	AB	AB	AB	AB	AB	AB	AB	AB	AB	AB	AB	AB	AB	AB	AB	AB	AB	AB	AB	AB	AB	AB	AA	AA	AA	AA	AA	AA	AA	AA	AA	AA	AA	AA	AA	AA	AA	AA	AA
06-033-29	a550817.4325015.052018.686_C04.CEL	AB	AB	AB	AB	AB	AB	AB	AB	AB	AB	AB	AB	AB	AB	AB	AB	AB	AB	AB	AB	AB	AB	AB	AB	AB	AB	AB	AB	AB	AB	AB	AB	AB	AB	AB	AB	AB	AB	AB	AB	AB	AB	AB	AB	AB	AB	AB	AB
06-033-45	a550817.4325015.052018.686_C05.CEL	AB	AB	AB	AB	AB	AB	AB	AB	AB	AB	AB	AB	AB	AB	AB	AB	AB	AB	AB	AB	AB	AB	AB	AB	AB	AB	AB	AB	AB	AB	AB	AB	AB	AB	AB	AB	AB	AB	AB	AB	AB	AB	AB	AB	AB	AB	AB	AB
06-033-61	a550817.4325015.052018.686_C06.CEL	AA	AA	AA	AA	AA	AB	AB	AB	AB	AB	AB	AB	AB	AB	AB	AB	AB	AB	AB	AB	AB	AB	AB	AB	AB	AB	AB	AB	AB	AB	AB	AB	AB	AB	AB	AB	AB	AB	AB	AB	AB	AB	AB	AB	AB	AB	AB	AB
06-033-78	a550817.4325015.052018.686_C07.CEL	AB	AB	AB	AB	AB	AB	AB	AB	AB	AB	AB	AB	AB	AB	AB	AB	AB	AB	AB	AB	AB	AB	AB	AB	AB	AB	AB	AB	AB	AB	AB	AB	AB	AB	AB	AB	AB	AB	AB	AB	AB	AB	AB	AB	AB	AB	AB	AB
03-002-9	a550817.4325015.052018.686_C10.CEL	AB	AB	AB	AB	AB	AB	AB	AB	AB	AB	AB	AB	AB	AB	AB	AB	AB	AB	AB	AB	AB	AB	AB	AB	AB	AB	AB	AB	AB	AA	AA	AA	AA	AA	AA	AA	AA	AA	AA	AA	AA	AA	AA	AA	AA	AA	AA	AA
03-002-82	a550817.4325015.052018.686_D01.CEL	AA	AA	AA	AA	AA	AA	AA	AA	AA	AA	AA	AA	AA	AA	AA	AA	AA	AA	AA	AA	AA	AA	AA	AA	AA	AA	AA	AA	AA	AA	AA	AA	AA	AA	AA	AA	AA	AA	AA	AA	AA	AA	AA	AA	AA	AA	AA	AA
03-002-97	a550817.4325015.052018.686_D02.CEL	AA	AA	AA	AA	AA	AA	AA	AA	AA	AA	AA	AA	AA	AA	AA	AA	AA	AA	AA	AA	AA	AA	AA	AA	AA	AA	AA	AA	AA	AA	AA	AA	AA	AA	AA	AA	AA	AA	AA	AA	AA	AB	AB	AB	AB	AB	AB	AB
03-002-24	a550817.4325015.052018.686_D07.CEL	AB	AB	AB	AB	AB	AB	AB	AB	AB	AB	AB	AB	AB	AB	AB	AB	AB	AB	AB	AB	AB	AB	AB	AB	AB	AB	AB	AB	AB	AB	AB	AB	AB	AA	AA	AA	AA	AA	AA	AA	AA	AA	AA	AA	AA	AA	AA	AA
03-002-38	a550817.4325015.052018.686_D08.CEL	AA	AA	AA	AA	AA	AA	AA	AA	AA	AA	AA	AA	AA	AA	AA	AA	AA	AA	AA	AA	AA	AA	AA	AA	AA	AA	AA	AA	AA	AA	AA	AA	AA	AA	AA	AA	AA	AA	AA	AA	AB	AB	AB	AB	AB	AB	AB	AB
03-002-50	a550817.4325015.052018.686_D09.CEL	AB	AB	AB	AB	AB	AB	AB	AB	AB	AB	AB	AB	AB	AB	AB	AB	AB	AB	AB	AB	AB	AB	AB	AB	AB	AB	AB	AB	AB	AB	AB	AB	AB	AB	AB	AB	AB	AB	AB	AB	AB	AB	AB	AB	AB	AB	AB	AB
03-002-74	a550817.4325015.052018.686_D10.CEL	AA	AA	AA	AA	AA	AA	AA	AA	AA	AA	AA	AA	AA	AA	AA	AA	AA	AA	AA	AA	AA	AA	AA	AA	AA	AA	AA	AB	AB	AB	AB	AB	AB	AB	AB	AB	AB	AB	AB	AB	AB	AB	AB	AB	AB	AB	AB	AB
03-002-98	a550817.4325015.052018.686_D12.CEL	AB	AB	AB	AB	AB	AB	AB	AB	AB	AB	AB	AB	AB	AB	AB	AB	AB	AB	AB	AB	AA	AA	AA	AA	AA	AA	AA	AA	AA	AA	AA	AA	AA	AA	AA	AA	AA	AA	AA	AA	AA	AA	AA	AA	AA	AA	AA	AA
03-002-27	a550817.4325015.052018.686_E05.CEL	AA	AA	AA	AA	AA	AA	AA	AA	AA	AA	AA	AA	AA	AA	AA	AA	AA	AA	AA	AA	AA	AA	AA	AA	AA	AA	AA	AA	AA	AA	AA	AA	AA	AA	AA	AA	AA	AA	AA	AA	AA	AA	AA	AA	AA	AA	AA	AA
03-002-15	a550817.4325015.052018.686_F01.CEL	AB	AB	AB	AB	AB	AB	AB	AB	AB	AB	AB	AB	AB	AB	AB	AB	AB	AB	AB	AB	AB	AB	AB	AB	AB	AB	AB	AA	AA	AA	AA	AA	AA	AA	AA	AA	AA	AA	AA	AA	AA	AA	AA	AA	AA	AA	AA	AA
03-002-30	a550817.4325015.052018.686_F02.CEL	AB	AB	AB	AB	AB	AB	AB	AB	AB	AB	AB	AB	AB	AB	AB	AB	AB	AB	AB	AB	AB	AB	AB	AB	AB	AB	AB	AB	AB	AB	AB	AB	AB	AB	AB	AB	AB	AB	AB	AB	AB	AB	AB	AB	AB	AB	AB	AB
03-002-40	a550817.4325015.052018.686_F03.CEL	AB	AB	AB	AB	AB	AB	AB	AB	AB	AB	AB	AB	AB	AB	AB	AB	AB	AB	AB	AB	AB	AB	AB	AB	AB	AB	AB	AB	AB	AB	AB	AB	AB	AB	AB	AB	AB	AB	AB	AB	AB	AB	AA	AA	AA	AA	AB	AB
03-002-101	a550817.4325015.052018.686_F07.CEL	AA	AA	AA	AA	AA	AA	AA	AA	AA	AA	AA	AA	AA	AA	AA	AA	AA	AA	AA	AA	AA	AA	AA	AA	AA	AA	AA	AA	AA	AA	AA	AA	AA	AA	AA	AA	AA	AA	AA	AA	AA	AA	AA	AA	AA	AA	AA	AA
03-002-43	a550817.4325015.052018.686_G01.CEL	AB	AB	AB	AB	AB	AB	AB	AB	AB	AB	AB	AB	AB	AB	AB	AB	AB	AB	AB	AB	AB	AB	AB	AB	AB	AB	AB	AB	AB	AB	AB	AB	AB	AB	AB	AB	AB	AB	AB	AB	AB	AB	AB	AB	AB	AB	AB	AB
03-002-102	a550817.4325015.052018.686_G03.CEL	AA	AA	AA	AA	AA	AA	AA	AA	AB	AB	AB	AB	AB	AB	AB	AB	AB	AB	AB	AB	AB	AB	AB	AB	AB	AB	AB	AB	AB	AB	AB	AB	AB	AB	AB	AB	AB	AB	AB	AB	AB	AB	AB	AB	AB	AB	AB	AB
03-002-19	a550817.4325015.052018.686_G07.CEL	AA	AA	AA	AA	AA	AA	AA	AA	AA	AA	AA	AA	AA	AA	AA	AA	AA	AA	AA	AA	AB	AB	AB	AB	AB	AB	AB	AB	AB	AB	AB	AB	AB	AB	AB	AB	AA	AA	AA	AA	AA	AA	AA	AA	AA	AA	AA	AA
03-002-34	a550817.4325015.052018.686_G08.CEL	AA	AA	AA	AA	AB	AB	AB	AB	AB	AB	AB	AB	AB	AB	AB	AB	AB	AB	AB	AB	AB	AB	AB	AB	AB	AB	AB	AB	AB	AB	AB	AB	AB	AB	AB	AB	AB	AB	AB	AB	AB	AB	AB	AB	AB	AB	AB	AB
03-002-44	a550817.4325015.052018.686_G09.CEL	AB	AB	AB	AB	AB	AB	AB	AB	AB	AB	AB	AB	AB	AB	AB	AB	AB	AB	AB	AB	AB	AB	AB	AB	AB	AB	AB	AB	AB	AB	AB	AB	AB	AB	AB	AB	AB	AB	AB	AB	AB	AB	AB	AB	AB	AB	AB	AB
03-002-58	a550817.4325015.052018.686_G10.CEL	AA	AA	AA	AA	AA	AA	AA	AA	AA	AA	AA	AA	AA	AA	AA	AA	AA	AA	AA	AA	AA	AA	AA	AA	AA	AA	AA	AA	AA	AA	AA	AA	AA	AA	AA	AA	AA	AA	AA	AA	AA	AA	AA	AA	AA	AA	AA	AA
03-002-103	a550817.4325015.052018.686_G12.CEL	AB	AB	AB	AB	AB	AB	AB	AB	AB	AB	AB	AB	AB	AB	AB	AB	AB	AB	AB	AB	AB	AB	AB	AB	AB	AB	AB	AB	AB	AB	AB	AB	AB	AB	AB	AB	AB	AB	AB	AB	AB	AB	AB	AB	AB	AB	AB	AB
03-002-45	a550817.4325015.052018.686_H05.CEL	AA	AA	AA	AA	AA	AA	AA	AA	AA	AA	AA	AA	AA	AA	AA	AA	AA	AA	AA	AA	AA	AA	AA	AA	AA	AA	AA	AA	AA	AA	AA	AA	AA	AA	AA	AA	AA	AA	AA	AA	AA	AA	AA	AA	AA	AA	AA	AA
03-002-59	a550817.4325015.052018.686_H06.CEL	AA	AA	AA	AA	AA	AA	AA	AA	AA	AA	AA	AA	AA	AA	AA	AA	AA	AA	AA	AA	AA	AA	AA	AA	AA	AA	AA	AA	AA	AA	AA	AA	AA	AA	AA	AA	AA	AA	AA	AA	AA	AA	AA	AA	AA	AA	AA	AA
03-002-80	a550817.4325015.052018.686_H08.CEL	AB	AB	AB	AB	AB	AB	AB	AB	AB	AB	AB	AB	AB	AB	AB	AB	AB	AB	AB	AB	AB	AB	AB	AB	AB	AB	AB	AB	AA	AA	AA	AA	AA	AA	AA	AA	AA	AA	AA	AA	AA	AA	AA	AA	AA	AA	AA	AA
05-011-84	a550817.4325015.052018.686_H10.CEL	AB	AB	AB	AB	AB	AB	AB	AB	AB	AB	AB	AB	AB	AB	AB	AB	AB	AB	AB	AB	AB	AB	AB	AB	AB	AB	AB	AB	AB	AB	AB	AB	AB	AB	AB	AB	AB	AB	AB	AB	AB	AB	AB	AB	AA	AA	AA	AA
06-033-13	a550817.4325015.052018.687_G03.CEL	AA	AA	AA	AA	AA	AA	AA	AA	AA	AA	AA	AA	AA	AA	AA	AA	AB	AB	AB	AB	AB	AB	AB	AB	AB	AB	AB	AB	AB	AB	AB	AB	AB	AB	AB	AB	AB	AB	AB	AB	AB	AB	AB	AB	AB	AB	AB	AB
06-033-84	a550817.4325015.052018.687_G05.CEL	AB	AB	AB	AB	AB	AB	AB	AB	AB	AB	AB	AB	AB	AB	AB	AB	AB	AB	AB	AB	AB	AB	AB	AB	AB	AB	AB	AB	AB	AB	AB	AB	AB	AB	AB	AB	AB	AB	AB	AB	AB	AB	AB	AB	AB	AB	AB	AB
06-033-88	a550817.4325015.052018.688_F06.CEL	AA	AA	AA	AA	AA	AA	AA	AA	AA	AA	AA	AA	AA	AA	AA	AA	AA	AA	AA	AA	AA	AA	AA	AA	AA	AA	AA	AA	AA	AA	AA	AA	AA	AA	AA	AA	AA	AA	AA	AA	AA	AA	AA	AA	AA	AA	AA	AA
06-033-2	a550817.4325015.052018.688_F07.CEL	AA	AA	AA	AA	AA	AA	AA	AA	AA	AA	AA	AA	AA	AA	AA	AA	AA	AA	AA	AA	AA	AA	AA	AA	AA	AA	AA	AA	AA	AA	AA	AA	AA	AA	AA	AB	AB	AB	AB	AB	AB	AB	AB	AB	AB	AB	AB	AB
06-033-19	a550817.4325015.052018.688_F08.CEL	AB	AB	AB	AB	AB	AB	AB	AB	AB	AB	AB	AB	AB	AB	AB	AB	AB	AB	AB	AB	AB	AB	AB	AB	AB	AB	AB	AB	AB	AB	AB	AB	AB	AB	AB	AB	AB	AB	AB	AB	AB	AB	AB	AB	AB	AB	AB	AB
06-033-52	a550817.4325015.052018.688_F09.CEL	AB	AB	AB	AB	AB	AB	AB	AB	AB	AB	AB	AB	AB	AB	AB	AB	AB	AA	AA	AA	AA	AA	AA	AA	AA	AA	AA	AA	AA	AA	AA	AA	AA	AA	AA	AA	AA	AA	AA	AA	AA	AA	AA	AA	AA	AA	AA	AA
06-033-32	a550817.4325015.052018.688_G06.CEL	AB	AB	AB	AB	AB	AB	AB	AB	AB	AB	AB	AB	AB	AB	AB	AB	AB	AB	AB	AB	AB	AB	AB	AB	AB	AB	AB	AB	AB	AB	AB	AB	AB	AB	AB	AB	AB	AB	AB	AB	AB	AB	AB	AB	AB	AB	AB	AB
06-033-27	a550817.4325015.052018.688_G08.CEL	AA	AA	AA	AA	AA	AA	AA	AA	AA	AA	AA	AA	AA	AA	AA	AA	AA	AA	AA	AA	AA	AB	AB	AB	AB	AB	AB	AB	AB	AB	AB	AB	AB	AB	AB	AB	AB	AB	AB	AB	AB	AB	AB	AB	AB	AB	AB	AB
06-033-64	a550817.4325015.052018.688_H06.CEL	AA	AA	AA	AA	AA	AA	AA	AA	AA	AA	AA	AA	AA	AA	AA	AA	AA	AA	AA	AA	AB	AB	AB	AB	AB	AB	AB	AB	AB	AB	AB	AB	AB	AB	AB	AB	AB	AB	AB	AB	AB	AB	AB	AB	AB	AB	AB	AB
06-033-26	a550817.4325015.052018.688_H07.CEL	AB	AB	AB	AB	AB	AB	AB	AB	AB	AB	AB	AB	AB	AB	AB	AB	AB	AB	AB	AB	AB	AB	AB	AB	AB	AB	AB	AB	AB	AB	AB	AB	AB	AB	AB	AB	AB	AB	AB	AB	AB	AB	AB	AB	AB	AB	AB	AB
06-033-35	a550817.4325015.052018.688_H08.CEL	AA	AA	AA	AA	AA	AA	AA	AA	AA	AA	AA	AA	AA	AA	AA	AA	AA	AA	AA	AA	AA	AA	AA	AA	AA	AA	AA	AA	AA	AA	AA	AA	AA	AA	AA	AA	AA	AA	AA	AA	AA	AA	AA	AA	AA	AA	AA	AA
06-033-94	a550817.4325015.052018.688_H10.CEL	AA	AA	AA	AA	AA	AB	AB	AB	AB	AB	AB	AB	AB	AB	AB	AB	AB	AB	AB	AB	AB	AB	AB	AB	AB	AB	AB	AB	AB	AB	AB	AB	AB	AB	AB	AB	AB	AB	AB	AB	AB	AB	AB	AB	AB	AB	AB	AB
03-002-8	a550817.4325015.052018.690_A02.CEL	AB	AB	AB	AB	AB	AB	AB	AB	AB	AB	AB	AB	AB	AB	AB	AB	AB	AB	AB	AB	AB	AB	AB	AB	AB	AB	AB	AB	AB	AB	AB	AB	AB	AB	AB	AB	AB	AB	AB	AB	AB	AB	AB	AB	AB	AB	AB	AB
03-002-22	a550817.4325015.052018.690_A03.CEL	AA	AA	AA	AA	AA	AA	AA	AA	AA	AA	AA	AA	AA	AA	AA	AA	AA	AA	AA	AA	AA	AA	AA	AA	AA	AA	AA	AA	AA	AA	AA	AA	AA	AA	AA	AA	AA	AA	AA	AA	AA	AA	AA	AA	AA	AA	AA	AA
03-002-36	a550817.4325015.052018.690_A04.CEL	AB	AB	AB	AB	AB	AB	AB	AB	AB	AB	AB	AB	AB	AB	AB	AB	AB	AB	AB	AB	AB	AB	AB	AB	AB	AB	AB	AB	AB	AB	AA	AA	AA	AA	AA	AA	AA	AA	AA	AA	AA	AA	AA	AA	AA	AA	AA	AA
03-002-46	a550817.4325015.052018.690_A05.CEL	AA	AA	AA	AA	AA	AA	AA	AA	AA	AA	AA	AA	AA	AA	AA	AA	AA	AA	AA	AA	AA	AA	AA	AA	AA	AA	AA	AA	AA	AA	AA	AA	AA	AA	AA	AA	AA	AA	AA	AA	AA	AA	AA	AA	AA	AA	AA	AA
07-033-103	a550817.4325015.052018.690_C01.CEL	AB	AB	AB	AA	AA	AA	AA	AA	AA	AA	AA	AA	AA	AA	AA	AA	AA	AA	AA	AA	AA	AA	AA	AA	AA	AA	AA	AA	AA	AA	AA	AA	AA	AA	AA	AA	AA	AA	AA	AA	AA	AA	AA	AA	AA	AA	AA	AA
06-033-14	a550817.4325015.052018.692_G08.CEL	AB	AB	AB	AB	AB	AB	AB	AB	AB	AB	AB	AB	AB	AB	AB	AB	AB	AB	AB	AB	AB	AB	AB	AB	AB	AB	AB	AB	AB	AB	AB	AB	AB	AB	AB	AB	AB	AB	AB	AB	AB	AB	AB	AB	AB	AB	AB	AB
06-033-22	a550817.4325015.052018.692_G09.CEL	AA	AA	AA	AA	AA	AA	AA	AA	AA	AA	AA	AA	AA	AA	AA	AA	AA	AA	AA	AA	AA	AA	AA	AA	AA	AA	AA	AA	AA	AA	AA	AA	AA	AA	AA	AA	AA	AA	AA	AA	AA	AA	AA	AA	AA	AA	AA	AA
06-033-46	a550817.4325015.052018.692_G10.CEL	AB	AB	AB	AB	AB	AB	AB	AB	AB	AA	AA	AA	AA	AA	AA	AA	AA	AA	AA	AA	AA	AA	AA	AA	AA	AA	AA	AA	AA	AA	AA	AA	AA	AA	AA	AA	AA	AA	AA	AA	AA	AA	AA	AA	AA	AA	AA	AA
06-033-87	a550817.4325015.052018.692_G12.CEL	AA	AA	AA	AA	AA	AA	AA	AA	AA	AA	AA	AA	AA	AA	AA	AA	AA	AA	AA	AA	AA	AA	AA	AA	AA	AA	AA	AA	AA	AA	AA	AA	AA	AA	AA	AA	AA	AA	AA	AA	AA	AA	AA	AA	AA	AA	AA	AA
06-033-15	a550817.4325015.052018.692_H02.CEL	AA	AA	AA	AA	AA	AA	AA	AA	AA	AA	AA	AA	AA	AA	AA	AA	AA	AA	AA	AA	AA	AA	AA	AA	AA	AA	AA	AA	AA	AA	AA	AA	AA	AA	AA	AA	AA	AA	AA	AA	AA	AA	AA	AA	AA	AA	AA	AA
06-033-31	a550817.4325015.052018.692_H03.CEL	AB	AB	AB	AB	AB	AB	AB	AB	AB	AB	AB	AB	AB	AB	AB	AB	AB	AB	AB	AB	AB	AB	AB	AB	AB	AB	AB	AB	AB	AB	AB	AB	AB	AB	AB	AB	AB	AB	AB	AB	AB	AB	AB	AB	AB	AB	AB	AB
06-033-39	a550817.4325015.052018.692_H04.CEL	AA	AA	AA	AA	AA	AA	AA	AA	AA	AA	AA	AA	AA	AA	AA	AA	AA	AA	AA	AA	AB	AB	AA	AA	AA	AA	AA	AA	AA	AA	AA	AA	AA	AA	AA	AA	AA	AA	AA	AA	AA	AA	AA	AA	AA	AA	AA	AA
06-033-47	a550817.4325015.052018.692_H05.CEL	AA	AA	AA	AA	AA	AA	AA	AA	AA	AA	AA	AA	AA	AA	AB	AB	AB	AB	AB	AB	AB	AB	AB	AB	AB	AB	AB	AB	AB	AB	AB	AB	AB	AB	AB	AB	AB	AB	AB	AB	AB	AB	AB	AB	AB	AB	AB	AB
06-033-55	a550817.4325015.052018.692_H06.CEL	AA	AA	AA	AA	AA	AA	AA	AA	AA	AA	AA	AA	AA	AA	AA	AA	AA	AA	AA	AA	AA	AA	AA	AA	AA	AA	AA	AA	AA	AA	AA	AA	AA	AA	AA	AA	AA	AA	AA	AA	AA	AA	AA	AA	AA	AA	AA	AA
06-033-71	a550817.4325015.052018.692_H07.CEL	AA	AA	AA	AA	AA	AA	AA	AA	AA	AA	AA	AA	AA	AA	AA	AA	AA	AB	AB	AB	AB	AB	AB	AB	AB	AB	AB	AB	AB	AB	AB	AB	AB	AB	AB	AB	AB	AB	AB	AB	AB	AB	AB	AB	AB	AB	AB	AB
06-033-80	a550817.4325015.052018.692_H08.CEL	AA	AA	AA	AA	AA	AA	AA	AA	AA	AA	AA	AA	AA	AA	AA	AA	AA	AA	AA	AA	AA	AA	AA	AA	AA	AA	AA	AB	AB	AB	AB	AB	AB	AB	AB	AB	AB	AB	AB	AB	AB	AB	AB	AB	AB	AB	AB	AB
06-033-8	a550817.4325015.052018.692_H10.CEL	AB	AB	AB	AB	AB	AB	AB	AB	AB	AB	AB	AB	AB	AB	AB	AB	AB	AB	AB	AB	AB	AB	AB	AB	AB	AB	AB	AB	AB	AB	AB	AB	AB	AB	AB	AB	AB	AB	AB	AB	AB	AB	AB	AB	AB	AB	AB	AB
06-033-16	a550817.4325015.052018.692_H11.CEL	AA	AA	AA	AA	AA	AA	AA	AA	AA	AA	AA	AA	AB	AB	AB	AB	AB	AB	AB	AB	AB	AB	AB	AB	AB	AB	AB	AB	AB	AB	AB	AB	AB	AB	AB	AB	AB	AB	AB	AB	AB	AB	AB	AB	AB	AB	AB	AB
06-033-24	a550817.4325015.052018.692_H12.CEL	AA	AA	AA	AA	AA	AA	AB	AB	AB	AB	AB	AB	AB	AB	AB	AB	AB	AB	AB	AB	AB	AB	AB	AB	AB	AB	AB	AB	AB	AB	AB	AB	AB	AB	AB	AB	AB	AB	AB	AB	AB	AB	AB	AB	AB	AB	AB	AB
06-033-34	a550817.4325015.052018.693_A07.CEL	AA	AA	AA	AA	AA	AA	AA	AA	AA	AA	AA	AA	AA	AA	AA	AA	AA	AA	AA	AA	AA	AA	AA	AA	AA	AA	AA	AA	AA	AA	AA	AA	AA	AB	AB	AB	AB	AB	AB	AB	AB	AB	AB	AB	AB	AB	AB	AB
06-033-77	a550817.4325015.052018.693_A09.CEL	AA	AA	AA	AA	AA	AA	AA	AA	AA	AA	AA	AA	AA	AA	AA	AA	AA	AA	AA	AA	AA	AA	AA	AA	AA	AA	AA	AA	AA	AA	AA	AA	AA	AA	AA	AA	AA	AA	AA	AA	AA	AA	AA	AA	AA	AA	AA	AA
03-002-23	a550817.4325015.052018.693_A10.CEL	AB	AB	AB	AB	AB	AB	AB	AB	AB	AB	AB	AB	AB	AB	AB	AB	AB	AB	AB	AB	AB	AB	AB	AB	AB	AB	AB	AB	AB	AB	AB	AB	AB	AB	AB	AB	AB	AB	AB	AB	AB	AB	AB	AB	AB	AB	AB	AB
06-033-30	a550817.4325015.052018.693_B05.CEL	AA	AA	AA	AA	AA	AA	AA	AA	AA	AA	AA	AA	AA	AA	AA	AA	AA	AA	AA	AA	AA	AA	AA	AA	AA	AA	AA	AA	AA	AA	AA	AA	AA	AA	AA	AA	AA	AA	AA	AA	AA	AA	AA	AA	AA	AA	AA	AA
06-033-33	a550817.4325015.052018.693_B06.CEL	AB	AB	AB	AB	AB	AB	AB	AB	AB	AB	AB	AB	AB	AB	AB	AB	AB	AB	AB	AB	AB	AB	AB	AA	AA	AA	AA	AA	AA	AA	AA	AA	AA	AA	AA	AA	AA	AA	AA	AA	AA	AA	AA	AA	AA	AA	AA	AA
06-033-42	a550817.4325015.052018.693_B07.CEL	AA	AA	AA	AA	AA	AA	AA	AA	AA	AA	AA	AA	AA	AA	AA	AA	AA	AA	AA	AA	AA	AA	AA	AA	AA	AA	AA	AA	AA	AA	AA	AA	AA	AA	AA	AA	AA	AA	AA	AA	AA	AA	AA	AA	AA	AA	AA	AA
06-033-20	a550817.4325015.052018.693_B08.CEL	AA	AA	AA	AA	AA	AA	AA	AA	AA	AA	AA	AA	AA	AA	AA	AA	AA	AA	AA	AA	AA	AA	AA	AA	AA	AA	AA	AA	AA	AA	AA	AA	AA	AA	AA	AA	AA	AA	AA	AA	AA	AA	AA	AA	AA	AA	AA	AA
06-033-85	a550817.4325015.052018.693_B09.CEL	AA	AA	AA	AA	AA	AA	AA	AA	AA	AA	AA	AA	AA	AA	AA	AA	AA	AA	AA	AA	AA	AA	AA	AA	AA	AA	AA	AA	AA	AA	AA	AA	AA	AA	AA	AA	AA	AA	AA	AA	AA	AA	AA	AA	AA	AA	AA	AA
06-033-54	a550817.4325015.052018.693_C04.CEL	AA	AA	AA	AA	AA	AB	AB	AB	AB	AB	AB	AB	AB	AB	AB	AB	AB	AB	AB	AB	AB	AB	AB	AB	AB	AB	AB	AB	AB	AB	AB	AB	AB	AB	AB	AB	AB	AB	AB	AB	AB	AB	AB	AB	AB	AB	AB	AB
06-033-65	a550817.4325015.052018.693_C05.CEL	AA	AA	AA	AA	AA	AA	AA	AA	AA	AA	AA	AA	AA	AA	AA	AA	AA	AA	AA	AA	AA	AA	AA	AA	AA	AA	AA	AA	AA	AA	AA	AA	AA	AA	AA	AA	AA	AA	AA	AA	AA	AA	AA	AA	AA	AA	AA	AA
06-033-50	a550817.4325015.052018.693_C06.CEL	AA	AA	AA	AA	AA	AA	AA	AA	AA	AA	AA	AA	AA	AA	AA	AA	AA	AA	AA	AA	AA	AA	AA	AA	AA	AA	AA	AA	AA	AA	AA	AA	AA	AA	AA	AA	AA	AA	AA	AA	AA	AA	AA	AA	AA	AA	AA	AA
06-033-28	a550817.4325015.052018.693_C07.CEL	AA	AA	AA	AA	AA	AA	AA	AA	AA	AA	AA	AA	AA	AA	AA	AA	AA	AA	AA	AA	AA	AA	AA	AA	AA	AA	AA	AA	AA	AA	AA	AA	AA	AA	AA	AA	AA	AA	AA	AA	AA	AA	AA	AA	AA	AA	AA	AA
06-033-93	a550817.4325015.052018.693_C08.CEL	AB	AB	AB	AB	AB	AB	AB	AB	AB	AB	AB	AB	AB	AB	AB	AB	AB	AB	AB	AB	AB	AB	AB	AB	AB	AB	AB	AB	AB	AB	AB	AB	AB	AB	AB	AB	AB	AB	AB	AB	AB	AB	AB	AB	AB	AB	AB	AB
03-002-56	a550817.4325015.052018.693_C09.CEL	AB	AB	AB	AB	AB	AB	AB	AB	AB	AB	AB	AB	AB	AB	AB	AB	AB	AA	AA	AA	AA	AA	AA	AA	AA	AA	AA	AA	AA	AA	AA	AA	AA	AA	AA	AA	AA	AA	AA	AA	AA	AA	AA	AA	AA	AA	AA	AA
06-033-82	a550817.4325015.052018.693_D05.CEL	AB	AB	AB	AB	AB	AB	AB	AB	AB	AB	AB	AB	AB	AB	AB	AB	AB	AB	AB	AB	AA	AA	AA	AA	AA	AA	AA	AA	AA	AA	AA	AA	AA	AA	AA	AA	AA	AA	AA	AA	AA	AA	AA	AA	AA	AA	AA	AA
06-033-66	a550817.4325015.052018.693_D06.CEL	AB	AB	AB	AB	AB	AB	AB	AB	AB	AB	AB	AB	AB	AB	AB	AB	AB	AB	AB	AB	AB	AB	AB	AB	AB	AB	AB	AB	AB	AB	AB	AB	AB	AB	AB	AB	AB	AB	AB	AB	AB	AB	AB	AB	AB	AB	AB	AB
06-033-36	a550817.4325015.052018.693_D07.CEL	AA	AA	AA	AA	AA	AA	AA	AA	AA	AA	AA	AA	AA	AA	AA	AA	AA	AA	AA	AA	AA	AA	AA	AA	AA	AA	AB	AB	AB	AB	AB	AB	AB	AB	AB	AB	AB	AB	AB	AB	AB	AB	AB	AB	AB	AB	AB	AB
03-002-70	a550817.4325015.052018.693_D09.CEL	AA	AA	AA	AA	AA	AA	AA	AA	AA	AA	AA	AA	AA	AA	AA	AA	AA	AA	AA	AA	AA	AA	AA	AA	AA	AA	AA	AA	AA	AA	AA	AA	AA	AA	AA	AA	AA	AA	AA	AA	AA	AA	AA	AA	AA	AA	AA	AA
06-033-63	a550817.4325015.052018.693_E04.CEL	AA	AA	AA	AA	AA	AA	AA	AA	AA	AA	AA	AA	AA	AA	AA	AA	AA	AA	AA	AA	AA	AA	AA	AA	AA	AA	AA	AA	AA	AA	AA	AA	AA	AA	AA	AA	AA	AA	AA	AA	AA	AB	AB	AB	AB	AB	AB	AB
06-033-90	a550817.4325015.052018.693_E05.CEL	AB	AB	AB	AB	AB	AB	AB	AB	AB	AB	AB	AB	AB	AB	AB	AB	AB	AB	AB	AB	AB	AB	AB	AB	AB	AB	AB	AB	AB	AB	AB	AB	AB	AB	AB	AB	AB	AB	AB	AB	AB	AB	AB	AB	AB	AB	AB	AB
06-033-91	a550817.4325015.052018.693_E06.CEL	AA	AA	AA	AA	AA	AA	AA	AA	AA	AA	AA	AA	AA	AA	AA	AA	AA	AA	AA	AA	AA	AA	AA	AA	AA	AA	AA	AA	AA	AA	AA	AA	AA	AA	AA	AA	AA	AA	AA	AA	AA	AA	AA	AA	AA	AA	AA	AA
06-033-44	a550817.4325015.052018.693_E07.CEL	AB	AB	AB	AB	AB	AB	AB	AB	AB	AB	AB	AB	AB	AB	AB	AB	AB	AB	AB	AB	AB	AB	AB	AB	AB	AB	AB	AB	AB	AB	AB	AB	AB	AB	AB	AB	AB	AB	AB	AB	AB	AB	AB	AB	AB	AB	AB	AB
06-033-53	a550817.4325015.052018.693_E08.CEL	AB	AB	AB	AB	AB	AB	AB	AB	AB	AB	AB	AA	AA	AA	AA	AA	AA	AA	AA	AA	AA	AA	AA	AA	AA	AA	AA	AA	AA	AA	AA	AA	AA	AA	AA	AA	AA	AA	AA	AA	AA	AB	AB	AB	AB	AB	AB	AB
07-033-61	a550817.4325016.052018.798_A12.CEL	AB	AB	AB	AB	AB	AB	AB	AB	AB	AB	AB	AB	AB	AB	AB	AB	AB	AB	AB	AB	AB	AB	AB	AB	AB	AB	AB	AB	AB	AB	AB	AB	AB	AB	AB	AB	AB	AB	AB	AB	AB	AB	AB	AB	AB	AB	AB	AB
06-033-97	a550817.4325016.052018.799_G10.CEL	AA	AA	AA	AA	AA	AA	AA	AA	AA	AA	AA	AA	AA	AA	AA	AA	AA	AA	AA	AA	AA	AA	AA	AA	AA	AA	AA	AA	AA	AA	AA	AA	AA	AA	AA	AA	AA	AA	AA	AA	AA	AA	AA	AA	AA	AA	AA	AA
07-033-92	a550817.4345742.120218.220_A02.CEL	AA	AA	AA	AA	AA	AA	AA	AA	AA	AA	AA	AA	AA	AA	AA	AA	AA	AA	AA	AA	AA	AA	AA	AA	AA	AA	AA	AA	AA	AA	AA	AA	AA	AA	AA	AA	AA	AA	AA	AA	AA	AA	AA	AA	AA	AA	AA	AA
07-033-95	a550817.4345742.120218.220_B02.CEL	AA	AA	AA	AA	AA	AA	AA	AA	AA	AA	AA	AA	AA	AA	AA	AA	AA	AA	AA	AA	AA	AA	AA	AA	AA	AA	AA	AA	AA	AA	AA	AA	AB	AB	AB	AB	AB	AB	AB	AB	AB	AB	AB	AB	AB	AB	AB	AB
07-033-97	a550817.4345742.120218.220_C02.CEL	AA	AA	AA	AA	AA	AA	AA	AA	AA	AA	AA	AA	AA	AA	AA	AA	AA	AB	AB	AB	AB	AB	AB	AB	AB	AB	AB	AB	AB	AB	AB	AB	AB	AB	AB	AB	AB	AB	AB	AB	AB	AB	AB	AB	AB	AB	AB	AB
07-033-79	a550817.4345742.120218.220_D01.CEL	AA	AA	AA	AA	AA	AA	AA	AA	AA	AA	AA	AA	AA	AA	AA	AA	AA	AB	AB	AB	AB	AB	AB	AB	AA	AA	AA	AA	AA	AA	AA	AA	AA	AA	AA	AA	AA	AA	AA	AA	AA	AA	AA	AA	AA	AA	AA	AA
07-033-83	a550817.4345742.120218.220_E01.CEL	AB	AB	AB	AB	AB	AB	AB	AB	AB	AB	AB	AB	AB	AB	AB	AB	AB	AB	AB	AB	AB	AB	AB	AB	AB	AB	AB	AB	AB	AB	AB	AB	AB	AB	AB	AB	AB	AB	AB	AB	AA	AA	AA	AA	AA	AA	AA	AA
07-033-39	a550817.4345742.120218.220_F09.CEL	AB	AB	AB	AB	AB	AB	AB	AB	AB	AB	AB	AB	AB	AB	AB	AB	AB	AB	AB	AB	AB	AB	AB	AB	AB	AB	AB	AB	AB	AB	AB	AB	AB	AB	AB	AB	AB	AB	AB	AB	AB	AB	AB	AB	AB	AB	AB	AB
07-033-15	a550817.4345742.120218.221_B02.CEL	AA	AA	AA	AA	AA	AA	AA	AA	AA	AA	AA	AA	AA	AA	AA	AA	AA	AA	AA	AA	AA	AA	AA	AA	AA	AA	AA	AA	AA	AA	AA	AA	AA	AA	AA	AA	AA	AA	AA	AA	AA	AA	AA	AB	AB	AB	AB	AB
07-033-98	a550817.4345742.120218.221_C02.CEL	AA	AA	AA	AA	AA	AA	AA	AA	AA	AA	AA	AA	AA	AA	AA	AA	AA	AA	AA	AA	AA	AA	AA	AA	AA	AA	AA	AA	AA	AA	AA	AA	AA	AA	AA	AA	AA	AA	AA	AA	AA	AA	AA	AA	AA	AA	AA	AB
03-002-17	a550817.4345742.120218.222_E01.CEL	AB	AB	AB	AB	AB	AB	AB	AB	AB	AB	AB	AB	AB	AB	AB	AB	AB	AB	AA	AA	AA	AA	AA	AA	AA	AA	AA	AA	AA	AA	AA	AA	AA	AA	AA	AA	AA	AA	AA	AA	AA	AA	AA	AA	AA	AA	AA	AA
03-002-21	a550817.4345742.120218.222_E02.CEL	AB	AB	AB	AB	AB	AB	AB	AB	AB	AB	AB	AB	AB	AB	AB	AB	AB	AB	AB	AB	AB	AB	AB	AB	AB	AB	AA	AA	AA	AA	AA	AA	AA	AA	AA	AA	AA	AA	AA	AA	AA	AA	AA	AA	AA	AA	AA	AA
03-002-35	a550817.4345742.120218.222_E03.CEL	AB	AB	AB	AB	AB	AB	AB	AB	AB	AB	AB	AB	AB	AB	AB	AB	AB	AB	AB	AB	AB	AB	AB	AB	AB	AB	AB	AB	AB	AB	AB	AB	AB	AB	AB	AB	AB	AB	AB	AB	AB	AB	AB	AB	AB	AB	AB	AB
05-011-86	a550817.4345742.120218.222_E08.CEL	AA	AA	AA	AA	AA	AA	AA	AA	AA	AA	AA	AA	AA	AA	AA	AA	AA	AA	AA	AA	AA	AA	AA	AA	AA	AB	AB	AB	AB	AB	AB	AB	AB	AB	AB	AB	AB	AB	AB	AB	AB	AB	AB	AB	AB	AB	AB	AB
05-011-87	a550817.4345742.120218.222_E09.CEL	AB	AB	AB	AB	AB	AB	AB	AB	AB	AB	AB	AB	AB	AB	AB	AB	AB	AB	AB	AB	AB	AB	AB	AB	AB	AB	AB	AB	AB	AB	AB	AB	AB	AB	AB	AB	AB	AB	AB	AB	AB	AB	AB	AB	AB	AB	AB	AB
06-033-5	a550817.4345742.120218.222_E11.CEL	AA	AA	AA	AA	AA	AA	AA	AA	AA	AA	AA	AA	AA	AA	AA	AA	AA	AA	AA	AA	AA	AA	AA	AA	AA	AA	AA	AA	AA	AA	AA	AA	AA	AA	AA	AA	AA	AA	AA	AA	AA	AA	AA	AA	AA	AA	AA	AA
06-033-6	a550817.4345742.120218.222_E12.CEL	AB	AB	AB	AB	AB	AB	AB	AB	AB	AB	AA	AA	AA	AA	AA	AA	AA	AA	AA	AA	AA	AA	AA	AA	AA	AA	AA	AA	AA	AA	AA	AA	AA	AA	AA	AA	AA	AA	AA	AA	AA	AA	AA	AA	AA	AA	AA	AA
06-033-18	a550817.4345742.120218.222_F01.CEL	AA	AA	AA	AA	AA	AA	AA	AA	AA	AA	AA	AA	AA	AA	AA	AA	AA	AA	AA	AA	AA	AA	AA	AA	AA	AA	AA	AA	AA	AA	AA	AA	AA	AA	AA	AA	AA	AA	AA	AA	AA	AA	AA	AA	AA	AA	AA	AA
06-033-37	a550817.4345742.120218.222_F02.CEL	AA	AA	AA	AA	AA	AA	AA	AB	AB	AB	AB	AB	AB	AB	AB	AB	AB	AB	AB	AB	AB	AB	AB	AB	AB	AB	AB	AB	AB	AB	AB	AB	AB	AB	AB	AB	AB	AB	AB	AB	AB	AB	AB	AB	AB	AB	AB	AB
06-033-68	a550817.4345742.120218.222_F03.CEL	AA	AA	AA	AA	AA	AA	AA	AA	AA	AA	AA	AA	AA	AA	AA	AA	AA	AA	AA	AA	AA	AA	AA	AA	AA	AA	AA	AA	AA	AA	AA	AA	AA	AA	AA	AA	AA	AA	AA	AA	AA	AA	AA	AA	AA	AA	AA	AA
06-033-69	a550817.4345742.120218.222_F04.CEL	AA	AA	AA	AA	AA	AA	AA	AA	AA	AA	AA	AA	AA	AA	AA	AA	AA	AA	AA	AA	AA	AA	AA	AA	AA	AA	AA	AA	AA	AA	AA	AA	AA	AA	AA	AA	AA	AA	AA	AA	AA	AA	AA	AA	AA	AA	AA	AA
06-033-86	a550817.4345742.120218.222_F06.CEL	AA	AA	AA	AA	AA	AA	AA	AA	AA	AA	AA	AA	AA	AA	AA	AA	AA	AA	AA	AA	AA	AA	AA	AA	AA	AA	AA	AA	AA	AA	AA	AA	AA	AA	AA	AA	AA	AA	AB	AB	AB	AB	AB	AB	AB	AB	AB	AB
07-033-1	a550817.4345742.120218.222_F08.CEL	AA	AA	AA	AA	AA	AA	AA	AA	AA	AA	AA	AA	AA	AA	AA	AA	AA	AA	AA	AA	AA	AA	AA	AA	AA	AA	AA	AA	AA	AA	AA	AA	AA	AA	AA	AA	AA	AA	AA	AA	AA	AA	AA	AA	AA	AA	AA	AA
07-033-2	a550817.4345742.120218.222_F09.CEL	AA	AA	AA	AA	AA	AA	AA	AA	AA	AA	AA	AA	AA	AA	AA	AB	AB	AB	AB	AB	AB	AB	AB	AB	AB	AB	AB	AB	AB	AB	AB	AB	AB	AB	AB	AB	AB	AB	AB	AB	AB	AB	AB	AB	AB	AB	AB	AB
07-033-7	a550817.4345742.120218.222_F11.CEL	AB	AB	AB	AB	AB	AB	AB	AB	AB	AB	AB	AB	AB	AB	AB	AB	AB	AB	AB	AA	AA	AA	AA	AA	AA	AA	AA	AA	AA	AA	AA	AA	AA	AA	AA	AA	AA	AA	AA	AA	AA	AA	AA	AA	AA	AA	AA	AA
07-033-8	a550817.4345742.120218.222_F12.CEL	AA	AA	AA	AA	AA	AA	AA	AA	AA	AA	AA	AA	AA	AA	AA	AA	AA	AA	AA	AA	AA	AA	AA	AA	AA	AA	AA	AA	AA	AA	AA	AA	AA	AB	AB	AB	AB	AB	AB	AB	AB	AB	AB	AB	AB	AB	AB	AB
07-033-10	a550817.4345742.120218.222_G01.CEL	AB	AB	AB	AB	AB	AB	AB	AB	AB	AB	AB	AB	AB	AB	AB	AB	AB	AB	AB	AB	AB	AB	AB	AB	AB	AB	AB	AB	AB	AB	AB	AB	AB	AB	AB	AB	AB	AB	AB	AB	AB	AB	AB	AB	AB	AB	AB	AB
07-033-12	a550817.4345742.120218.222_G02.CEL	AA	AA	AA	AA	AA	AA	AA	AA	AA	AA	AA	AA	AA	AA	AA	AA	AA	AB	AB	AB	AB	AB	AB	AB	AB	AB	AB	AB	AB	AB	AB	AB	AB	AB	AB	AB	AB	AB	AB	AB	AB	AB	AB	AB	AB	AB	AB	AB
07-033-19	a550817.4345742.120218.222_G04.CEL	AA	AA	AA	AA	AA	AA	AA	AA	AA	AA	AA	AA	AA	AA	AA	AA	AA	AA	AA	AA	AA	AA	AA	AA	AA	AA	AA	AA	AA	AA	AA	AA	AA	AA	AA	AA	AA	AA	AA	AA	AA	AA	AA	AA	AA	AA	AA	AA
07-033-21	a550817.4345742.120218.222_G05.CEL	AA	AA	AA	AA	AA	AA	AA	AA	AA	AA	AA	AA	AA	AA	AA	AA	AA	AA	AA	AA	AA	AA	AA	AA	AA	AA	AA	AA	AA	AA	AA	AA	AA	AA	AA	AA	AA	AA	AA	AA	AA	AA	AA	AA	AA	AA	AA	AA
07-033-22	a550817.4345742.120218.222_G06.CEL	AA	AA	AA	AA	AA	AA	AA	AA	AA	AA	AA	AA	AA	AA	AA	AA	AA	AA	AA	AA	AA	AA	AA	AA	AA	AA	AA	AA	AA	AA	AA	AA	AA	AA	AA	AA	AA	AA	AA	AA	AA	AA	AA	AA	AA	AA	AA	AA
07-033-36	a550817.4345742.120218.222_G11.CEL	AB	AB	AB	AB	AB	AB	AB	AB	AB	AB	AB	AB	AB	AB	AB	AB	AB	AB	AB	AB	AB	AB	AB	AB	AB	AB	AB	AB	AB	AB	AB	AB	AB	AB	AB	AB	AB	AB	AB	AB	AB	AB	AB	AB	AB	AB	AB	AB
[truncated: 1,116 more columns]

## Sheet: Idaho_genetic_map
ID	Genotype	AX.170671736	AX.170671920	AX.170672214	AX.170672304	AX.170672416	AX.170672467	AX.170672726	AX.170672926	AX.170609661	AX.170609530	AX.170609676	AX.171159631	AX.170734241	AX.170734388	AX.170732253	AX.170858022	AX.170858229	AX.170858803	AX.170858858	AX.171206848	AX.171214816	AX.171497441	AX.171038002	AX.171594563	AX.170771910	AX.170771394	AX.170771672	AX.170771363	AX.170771217	AX.171179844	AX.170770988	AX.170770935	AX.170770916	AX.170770887	AX.170770647	AX.171520900	AX.170770580	AX.170769317	AX.171520544	AX.170769014	AX.170768814	AX.170768739	AX.170768680	AX.170768568	AX.170760996	AX.171178473	AX.170761137	AX.170761487
		1	1	1	1	1	1	1	1	1	1	1	1	1	1	1	1	1	1	1	1	1	1	1	1	1	1	1	1	1	1	1	1	1	1	1	1	1	1	1	1	1	1	1	1	1	1	1	1
		0	0.588809	1.18762	1.78643	2.38524	2.98405	3.58286	4.18155	6.00019	6.59887	7.19768	7.19768	7.79649	7.79649	8.3953	8.99411	9.59292	10.1917	11.3967	11.9954	12.5941	14.4126	16.231	18.0495	18.6482	19.247	19.247	19.8458	20.4446	21.0435	21.6423	22.2411	22.8399	23.4387	24.0375	24.0375	24.6361	27.705	28.3035	29.5085	30.1073	30.7061	31.3049	31.9037	32.5025	33.1013	33.7002	34.299
07-033-14	a550817.4325015.052018.683_A06.CEL	AA	AA	AA	AA	AA	AA	AA	AA	AA	AA	AA	AA	AA	AA	AA	AA	AA	AA	AA	AA	AA	AA	AA	AA	AA	AA	AA	AA	AA	AA	AA	AA	AA	AA	AA	AA	AA	AA	AA	AA	AA	AA	AA	AA	AA	AA	AA	AA
07-033-6	a550817.4325015.052018.683_A07.CEL	AB	AB	AB	AB	AB	AB	AB	AB	AB	AB	AB	AB	AB	AB	AB	AB	AB	AB	AB	AB	AB	AB	AB	AB	AB	AB	AB	AB	AB	AB	AB	AB	AB	AB	AB	AB	AB	AB	AB	AB	AB	AB	AB	AB	AB	AB	AB	AB
06-033-104	a550817.4325015.052018.683_A08.CEL	AA	AA	AA	AA	AA	AA	AA	AA	AA	AA	AA	AA	AA	AA	AA	AA	AA	AA	AA	AA	AA	AA	AA	AA	AA	AA	AA	AA	AA	AA	AA	AA	AA	AA	AA	AA	AA	AA	AA	AA	AA	AA	AA	AA	AA	AA	AA	AA
06-033-95	a550817.4325015.052018.683_A09.CEL	AB	AB	AB	AB	AB	AB	AB	AB	AB	AB	AB	AB	AB	AB	AB	AB	AB	AB	AB	AB	AB	AB	AB	AB	AB	AB	AB	AB	AB	AB	AB	AB	AB	AB	AB	AB	AB	AB	AB	AB	AB	AB	AB	AB	AB	AB	AB	AB
07-033-99	a550817.4325015.052018.683_B03.CEL	AB	AB	AB	AB	AB	AB	AB	AB	AB	AB	AB	AB	AB	AB	AB	AB	AB	AB	AB	AB	AB	AB	AB	AB	AB	AB	-	AB	AB	AB	AB	AB	AB	AB	AB	AB	AB	AB	AB	AB	AB	AB	AB	AB	AA	AA	AA	AA
07-033-106	a550817.4325015.052018.683_B05.CEL	AA	AA	AA	AA	AA	AA	AA	AA	AA	AA	AA	AA	AA	AA	AA	AA	AA	AA	AA	AA	AA	AA	AA	AA	AA	AA	AA	AA	AA	AA	AA	AA	AA	AA	AA	AA	AA	AA	AA	AA	AA	AA	AA	AA	AA	AA	AA	AA
07-033-110	a550817.4325015.052018.683_B07.CEL	AB	AB	AB	AB	AB	AB	AB	AB	AB	AB	AB	AB	AB	AB	AB	AB	AB	AB	AB	AB	AB	AB	AB	AB	AB	AB	AB	AB	AB	AB	AB	AB	AB	AB	AB	AB	AB	AB	AB	AB	AB	AB	AB	AB	AB	AB	AB	AB
07-033-109	a550817.4325015.052018.683_B08.CEL	AA	AA	AA	AA	AA	AA	AA	AA	AA	AA	AA	AA	AA	AA	AA	AA	AB	AB	AB	AB	AB	AB	AB	AB	AB	AB	AB	AB	AB	AB	AB	AB	AB	AB	AB	AB	AB	AB	AB	AB	AB	AB	AB	AB	AB	AB	AB	AB
07-033-108	a550817.4325015.052018.683_B10.CEL	AB	AB	AB	AB	AB	AB	AB	AB	AB	AB	AB	AB	AB	AB	AB	AB	AB	AB	AB	AB	AB	AB	AB	AB	AB	AB	AB	AB	AB	AB	AB	AB	AB	AB	AB	AB	AB	AB	AB	AB	AB	AB	AB	AB	AB	AB	AB	AB
07-033-107	a550817.4325015.052018.683_B11.CEL	AA	AA	AA	AA	AA	AA	AA	AA	AA	AA	AA	AA	AA	AA	AA	AA	AA	AA	AA	AA	AA	AA	AA	AA	AA	AA	AA	AA	AA	AA	AA	AA	AA	AA	AA	AA	AA	AA	AA	AA	AA	AA	AA	AA	AA	AA	AA	AA
07-033-96	a550817.4325015.052018.683_C02.CEL	AA	AA	AA	AA	AA	AA	AA	AA	AA	AA	AA	AA	AA	AA	AA	AA	AA	AA	AA	AA	AA	AA	AA	AA	AA	AA	AA	AA	AA	AA	AA	AA	AA	AA	AA	AA	AA	AA	AA	AA	AA	AA	AA	AA	AA	AA	AA	AA
07-033-105	a550817.4325015.052018.683_C04.CEL	AA	AA	AA	AA	AA	AA	AA	AA	AA	AA	AA	AA	AA	AA	AA	AA	AA	AA	AA	AA	AA	AA	AA	AA	AA	AA	AA	AA	AA	AA	AA	AA	AA	AA	AA	AA	AA	AA	AA	AA	AA	AA	AA	AA	AA	AB	AB	AB
07-033-94	a550817.4325015.052018.683_C05.CEL	AA	AA	AA	AA	AA	AA	AA	AA	AA	AA	AA	AA	AA	AA	AA	AA	AA	AA	AA	AA	AA	AA	AA	AA	AA	AA	AA	AA	AA	AA	AA	AA	AA	AA	AA	AA	AA	AB	AB	AB	AB	AB	AB	AB	AB	AB	AB	AB
07-033-112	a550817.4325015.052018.683_D01.CEL	AB	AB	AB	AB	AB	AB	AB	AB	AB	AB	AB	AB	AB	AB	AB	AB	AB	AB	AB	AB	AB	AB	AB	AB	AB	AB	AB	AB	AB	AB	AB	AB	AB	AB	AB	AB	AB	AB	AB	AB	AB	AB	AB	AB	AB	AB	AB	AB
06-033-38	a550817.4325015.052018.684_B06.CEL	AB	AB	AB	AB	AB	AB	AB	AB	AB	AB	AB	AB	AB	AB	AB	AB	AB	AB	AB	AB	AB	AB	AA	AA	AA	AA	AA	AA	AA	AA	AA	AA	AA	AA	AA	AA	AA	AA	AA	AA	AA	AA	AA	AA	AA	AA	AA	AA
06-033-23	a550817.4325015.052018.684_B09.CEL	AB	AB	AB	AB	AB	AB	AB	AB	AB	AB	AB	AB	AB	AB	AB	AB	AB	AB	AB	AB	AB	AB	AB	AB	AB	AB	AB	AB	AB	AB	AB	AB	AB	AB	AB	AB	AB	AB	AB	AB	AB	AB	AB	AB	AB	AB	AB	AB
06-033-3	a550817.4325015.052018.684_B10.CEL	AB	AB	AB	AB	AB	AB	AB	AB	AB	AB	AB	AB	AB	AB	AB	AB	AB	AB	AB	AB	AB	AB	AB	AB	AB	AB	AB	AB	AB	AB	AB	AB	AB	AB	AB	AB	AB	AB	AB	AB	AB	AB	AB	AB	AB	AB	AB	AB
03-002-37	a550817.4325015.052018.684_C03.CEL	AB	AB	AB	AB	AA	AA	AA	AA	AA	AA	AA	AA	AA	AA	AA	AA	AA	AA	AA	AA	AA	AA	AA	AA	AA	AA	AA	AA	AA	AA	AA	AA	AA	AA	AA	AA	AA	AA	AA	AA	AA	AA	AA	AA	AA	AA	AA	AA
03-002-66	a550817.4325015.052018.684_C07.CEL	AB	AB	AB	AB	AB	AB	AB	AB	AB	AB	AB	AB	AB	AB	AB	AB	AB	AB	AB	AB	AB	AB	AB	AB	AB	AB	AB	AB	AB	AB	AB	AB	AB	AB	AA	AA	AA	AA	AA	AA	AA	AA	AA	AA	AA	AA	AA	AA
03-002-39	a550817.4325015.052018.684_C08.CEL	AB	AB	AB	AB	AB	AB	AB	AB	AB	AB	AB	AB	AB	AB	AB	AB	AB	AB	AB	AB	AB	AB	AB	AB	AB	AB	AB	AB	AB	AB	AB	AB	AB	AB	AB	AB	AB	AB	AB	AB	AB	AB	AB	AB	AB	AB	AB	AB
03-002-75	a550817.4325015.052018.684_C09.CEL	AA	AA	AA	AA	AA	AA	AA	AA	AA	AA	AA	AA	AA	AA	AA	AA	AA	AA	AA	AA	AA	AA	AA	AA	AA	AA	AA	AA	AA	AA	AA	AA	AA	AA	AA	AA	AA	AA	AA	AA	AA	AA	AA	AA	AA	AA	AA	AA
03-002-78	a550817.4325015.052018.684_D01.CEL	AB	AB	AB	AB	AB	AB	AB	AB	AB	AB	AB	AB	AB	AB	AB	AB	AB	AB	AB	AB	AB	AB	AB	AB	AB	AB	AB	AB	AB	AB	AB	AB	AB	AB	AB	AB	AB	AB	AB	AB	AA	AA	AA	AA	AA	AA	AA	AA
03-002-4	a550817.4325015.052018.684_D02.CEL	AA	AA	AA	AA	AA	AA	AA	AA	AA	AA	AA	AA	AA	AA	AA	AA	AA	AA	AA	AA	AA	AA	AA	AA	AA	AA	AA	AA	AA	AA	AA	AA	AA	AA	AA	AA	AA	AA	AA	AA	AA	AA	AA	AA	AA	AA	AA	AA
03-002-92	a550817.4325015.052018.684_D03.CEL	AA	AA	AA	AA	AA	AA	AA	AA	AA	AA	AA	AA	AA	AA	AA	AA	AA	AA	AA	AA	AA	AA	AA	AA	AA	AA	AA	AA	AA	AA	AA	AA	AA	AA	AA	AA	AA	AA	AA	AA	AA	AA	AA	AA	AA	AA	AA	AA
07-033-78	a550817.4325015.052018.684_E03.CEL	AA	AA	AA	AA	AA	AA	AA	AA	AA	AA	AA	AA	AA	AA	AA	AA	AA	AA	AA	AA	AA	AA	AA	AA	AA	AA	AA	AA	AA	AA	AA	AA	AA	AA	AA	AA	AA	AA	AA	AA	AA	AA	AA	AA	AA	AA	AA	AA
07-033-20	a550817.4325015.052018.684_E10.CEL	AB	AB	AB	AA	AA	AA	AA	AA	AA	AA	AA	AA	AA	AA	AA	AA	AA	AA	AA	AA	AA	AA	AA	AA	AA	AA	AA	AA	AA	AA	AA	AA	AA	AA	AA	AA	AA	AA	AA	AA	AA	AA	AA	AA	AA	AA	AA	AA
07-033-77	a550817.4325015.052018.684_F01.CEL	AB	AB	AB	AB	AB	AB	AB	AB	AB	AB	AB	AB	AB	AB	AB	AB	AB	AB	AB	AB	AB	AB	AB	AB	AB	AB	AB	AB	AB	AB	AB	AB	AB	AB	AB	AB	AB	AB	AB	AB	AB	AB	AB	AB	AB	AB	AB	AB
07-033-53	a550817.4325015.052018.684_F03.CEL	AA	AA	AA	AA	AA	AA	AA	AA	AA	AA	AA	AA	AA	AA	AA	AA	AA	AA	AA	AA	AA	AA	AA	AA	AA	AA	AA	AA	AA	AA	AA	AA	AA	AA	AA	AA	AA	AA	AA	AA	AA	AA	AA	AA	AA	AA	AA	AA
07-033-11	a550817.4325015.052018.684_F07.CEL	AA	AA	AA	AA	AA	AA	AA	AA	AA	AA	AA	AA	AA	AA	AA	AA	AA	AA	AA	AA	AA	AA	AA	AA	AA	AA	AA	AA	AA	AA	AA	AA	AA	AA	AA	AA	AA	AA	AA	AA	AA	AA	AA	AA	AA	AA	AA	AA
07-033-3	a550817.4325015.052018.684_F08.CEL	AB	AB	AB	AB	AB	AB	AB	AB	AB	AB	AB	AB	AB	AB	AB	AB	AB	AB	AB	AB	AB	AB	AB	AB	AB	AB	AB	AB	AB	AB	AB	AB	AB	AB	AB	AB	AB	AB	AB	AB	AB	AB	AB	AB	AB	AB	AB	AB
07-033-76	a550817.4325015.052018.684_F11.CEL	AA	AA	AA	AA	AA	AB	AB	AB	AB	AB	AB	AB	AB	AB	AB	AB	AB	AB	AB	AB	AB	AB	AB	AB	AB	AB	AB	AB	AB	AB	AB	AB	AB	AB	AB	AB	AB	AB	AB	AB	AB	AB	AB	AB	AB	AB	AB	AB
07-033-67	a550817.4325015.052018.684_G04.CEL	AA	AA	AA	AA	AA	AA	AA	AA	AA	AA	AA	AA	AA	AA	AA	AA	AA	AA	AA	AA	AA	AA	AA	AA	AA	AA	AA	AA	AA	AA	AA	AA	AA	AA	AA	AA	AA	AA	AA	AA	AA	AA	AA	AA	AA	AA	AA	AA
07-033-82	a550817.4325015.052018.684_G08.CEL	AA	AA	AA	AA	AA	AA	AA	AA	AA	AA	AA	AA	AA	AA	AA	AA	AA	AA	AA	AA	AA	AA	AA	AA	AA	AA	AA	AA	AA	AA	AA	AA	AA	AA	AA	AA	AA	AA	AA	AA	AA	AA	AA	AA	AA	AA	AA	AA
07-033-16	a550817.4325015.052018.684_H01.CEL	AB	AB	AB	AB	AB	AB	AB	AB	AB	AB	AB	AB	AB	AB	AB	AB	AB	AB	AB	AB	AB	AB	AB	AB	AB	AA	AA	AA	AA	AA	AA	AA	AA	AA	AA	AA	AA	AA	AA	AA	AA	AA	AA	AA	AA	AA	AA	AA
06-033-105	a550817.4325015.052018.684_H10.CEL	AB	AB	AA	AA	AA	AA	AA	AA	AA	AA	AA	AA	AA	AA	AA	AA	AA	AA	AA	AA	AA	AA	AA	AA	AA	AA	AA	AA	AA	AA	AA	AA	AA	AA	AA	AA	AA	AA	AA	AA	AA	AA	AA	AA	AA	AA	AA	AA
06-033-96	a550817.4325015.052018.684_H11.CEL	AA	AA	AA	AA	AA	AA	AA	AA	AA	AA	AA	AA	AA	AA	AA	AA	AA	AA	AA	AA	AA	AA	AA	AA	AA	AA	AA	AB	AB	AB	AB	AB	AB	AB	AB	AB	AB	AB	AB	AB	AB	AB	AB	AB	AB	AB	AB	AB
07-033-80	a550817.4325015.052018.684_H12.CEL	AA	AA	AA	AA	AA	AA	AA	AA	AA	AA	AA	AA	AA	AA	AA	AA	AA	AA	AA	AA	AA	AA	AA	AA	AA	AA	AA	AA	AA	AA	AA	AA	AA	AA	AA	AA	AA	AA	AA	AA	AA	AA	AA	AB	AB	AB	AB	AB
06-033-48	a550817.4325015.052018.686_A02.CEL	AB	AB	AB	AB	AB	AB	AB	AB	AB	AB	AB	AB	AB	AB	AB	AB	AB	AB	AB	AB	AB	AB	AB	AB	AB	AB	AB	AB	AB	AB	AB	AB	AB	AB	AB	AB	AB	AB	AB	AB	AB	AA	AA	AA	AA	AA	AA	AA
06-033-56	a550817.4325015.052018.686_A03.CEL	AA	AA	AA	AA	AA	AA	AA	AA	AA	AA	AA	AA	AA	AA	AA	AA	AA	AA	AA	AA	AA	AA	AA	AA	AA	AA	AA	AA	AA	AA	AA	AA	AA	AA	AA	AA	AA	AA	AA	AA	AA	AA	AA	AA	AA	AA	AA	AA
06-033-81	a550817.4325015.052018.686_A05.CEL	AB	AB	AB	AB	AB	AB	AB	AA	AA	AA	AA	AA	AA	AA	AA	AA	AA	AA	AA	AA	AA	AA	AA	AA	AA	AA	AA	AA	AA	AA	AA	AA	AA	AA	AA	AA	AA	AA	AA	AA	AA	AA	AA	AA	AA	AA	AA	AA
06-033-89	a550817.4325015.052018.686_A06.CEL	AA	AA	AA	AA	AA	AA	AA	AA	AB	AB	AB	AB	AB	AB	AB	AB	AB	AB	AB	AB	AB	AB	AB	AB	AA	AA	AA	AA	AA	AA	AA	AA	AA	AA	AA	AA	AA	AA	AA	AA	AA	AA	AA	AA	AA	AA	AA	AA
06-033-1	a550817.4325015.052018.686_A07.CEL	AA	AA	AA	AA	AA	AA	AA	AA	AA	AA	AA	AA	AA	AA	AA	AA	AA	AB	AB	AB	AB	AB	AB	AB	AB	AB	AB	AB	AB	AB	AB	AB	AB	AB	AB	AB	AB	AB	AB	AB	AB	AB	AB	AB	AB	AB	AB	AB
06-033-9	a550817.4325015.052018.686_A08.CEL	AB	AB	AB	AB	AB	AB	AB	AB	AB	AB	AB	AB	AB	AB	AB	AB	AB	AB	AB	AB	AB	AB	AB	AB	AB	AB	AB	AB	AB	AB	AB	AB	AB	AB	AB	AB	AB	AB	AB	AB	AB	AB	AB	AB	AB	AB	AB	AB
06-033-25	a550817.4325015.052018.686_A09.CEL	AB	AB	AB	AB	AB	AB	AB	AB	AB	AB	AB	AB	AB	AB	AB	AB	AB	AB	AB	AA	AA	AA	AA	AA	AA	AA	AA	AA	AA	AA	AA	AA	AA	AA	AA	AA	AA	AA	AA	AA	AA	AA	AA	AA	AA	AA	AA	AA
06-033-41	a550817.4325015.052018.686_A10.CEL	AB	AB	AB	AB	AB	AB	AB	AB	AB	AB	AB	AB	AB	AB	AB	AB	AB	AB	AB	AB	AB	AB	AB	AB	AB	AB	AB	AB	AB	AB	AB	AB	AB	AB	AB	AB	AB	AB	AB	AB	AB	AB	AB	AB	AB	AB	AB	AB
06-033-49	a550817.4325015.052018.686_A11.CEL	AB	AB	AB	AB	AB	AB	AB	AB	AB	AB	AB	AB	AB	AB	AB	AB	AB	AB	AB	AB	AB	AB	AB	AB	AB	AB	AB	AB	AB	AB	AB	AB	AB	AB	AB	AB	AB	AB	AB	AB	AB	AB	AB	AB	AB	AB	AB	AB
06-033-73	a550817.4325015.052018.686_B01.CEL	AB	AB	AB	AB	AB	AB	AB	AB	AB	AB	AB	AB	AB	AB	AB	AB	AB	AB	AB	AB	AB	AB	AB	AB	AB	AB	AB	AB	AB	AB	AB	AB	AB	AB	AB	AB	AB	AB	AB	AB	AB	AB	AB	AB	AB	AB	AB	AB
06-033-10	a550817.4325015.052018.686_B02.CEL	AB	AB	AB	AB	AB	AB	AB	AB	AB	AB	AB	AB	AB	AB	AB	AB	AB	AB	AB	AB	AB	AB	AB	AB	AB	AB	AB	AB	AB	AB	AB	AB	AB	AB	AB	AB	AB	AB	AB	AB	AB	AB	AA	AA	AA	AA	AA	AA
06-033-58	a550817.4325015.052018.686_B03.CEL	AB	AB	AB	AB	AB	AB	AB	AB	AB	AB	AB	AB	AB	AB	AB	AB	AB	AB	AB	AB	AB	AB	AB	AB	AB	AB	AB	AB	AB	AB	AB	AB	AB	AB	AB	AB	AB	AB	AB	AB	AB	AB	AB	AB	AB	AB	AB	AB
06-033-83	a550817.4325015.052018.686_B05.CEL	AB	AB	AB	AB	AB	AB	AB	AB	AB	AB	AB	AB	AB	AB	AB	AA	AA	AA	AA	AA	AA	AA	AA	AA	AA	AA	AA	AA	AA	AA	AA	AA	AA	AA	AA	AA	AA	AA	AA	AA	AA	AA	AA	AA	AA	AA	AA	AA
06-033-51	a550817.4325015.052018.686_B08.CEL	AA	AA	AA	AA	AA	AA	AA	AA	AA	AA	AA	AA	AA	AA	AA	AA	AA	AA	AA	AA	AA	AA	AA	AA	AA	AA	AA	AA	AA	AA	AA	AA	AA	AA	AA	AA	AA	AB	AB	AB	AB	AB	AB	AB	AB	AB	AB	AB
06-033-75	a550817.4325015.052018.686_B10.CEL	AB	AB	AB	AB	AB	AB	AB	AB	AB	AB	AB	AB	AB	AB	AB	AB	AB	AB	AA	AA	AA	AA	AA	AA	AA	AA	AA	AA	AA	AA	AA	AA	AA	AA	AA	AA	AA	AA	AA	AA	AA	AA	AA	AA	AA	AA	AA	AA
06-033-4	a550817.4325015.052018.686_B12.CEL	AA	AA	AA	AA	AA	AA	AA	AA	AA	AA	AA	AA	AA	AA	AA	AA	AA	AA	AA	AA	AA	AA	AA	AA	AA	AA	AA	AA	AA	AA	AA	AA	AA	AA	AA	AA	AA	AA	AA	AA	AA	AA	AA	AA	AA	AA	AA	AA
06-033-12	a550817.4325015.052018.686_C01.CEL	AB	AB	AB	AB	AB	AB	AA	AA	AA	AA	AA	AA	AA	AA	AA	AA	AA	AA	AA	AA	AA	AA	AA	AA	AA	AA	AA	AA	AA	AA	AA	AA	AA	AA	AA	AA	AA	AA	AA	AA	AA	AA	AA	AA	AA	AA	AA	AA
06-033-29	a550817.4325015.052018.686_C04.CEL	AB	AB	AB	AB	AB	AB	AB	AB	AB	AB	AB	AB	AB	AB	AB	AB	AB	AB	AB	AB	AB	AB	AB	AB	AB	AB	AB	AB	AB	AB	AB	AB	AB	AB	AB	AB	AB	AB	AB	AB	AB	AB	AB	AB	AB	AB	AB	AB
06-033-45	a550817.4325015.052018.686_C05.CEL	AB	AB	AB	AB	AB	AB	AB	AB	AB	AB	AB	AB	AB	AB	AB	AB	AB	AB	AB	AB	AB	AB	AB	AB	AB	AB	AB	AB	AB	AB	AB	AB	AB	AB	AB	AB	AB	AB	AB	AB	AB	AB	AB	AB	AB	AB	AB	AB
06-033-61	a550817.4325015.052018.686_C06.CEL	AB	AB	AB	AB	AB	AB	AB	AB	AB	AB	AB	AB	AB	AB	AB	AB	AB	AB	AB	AB	AB	AB	AB	AB	AB	AB	AB	AB	AB	AB	AB	AB	AB	AB	AB	AB	AB	AB	AB	AB	AB	AB	AB	AB	AB	AB	AB	AB
06-033-78	a550817.4325015.052018.686_C07.CEL	AB	AB	AB	AB	AB	AB	AB	AB	AB	AB	AB	AB	AB	AB	AB	AB	AB	AB	AB	AB	AB	AB	AB	AB	AB	AB	AB	AB	AB	AB	AB	AB	AB	AB	AB	AB	AB	AB	AB	AB	AB	AB	AB	AB	AB	AB	AB	AB
03-002-9	a550817.4325015.052018.686_C10.CEL	AB	AB	AB	AB	AB	AB	AB	AB	AB	AB	AB	AB	AB	AB	AB	AB	AB	AB	AB	AB	AB	AB	AB	AB	AB	AB	AB	AB	AB	AB	AB	AB	AB	AB	AB	AB	AB	AB	AB	AB	AB	AB	AB	AB	AB	AB	AB	AB
03-002-82	a550817.4325015.052018.686_D01.CEL	AA	AA	AA	AA	AA	AA	AA	AA	AA	AA	AA	-	AA	AA	AA	AA	AA	AA	AA	AA	AA	AA	AA	AA	AA	AA	AA	AA	AA	AA	AA	AA	AA	AA	AA	AA	AA	AB	AB	AB	AB	AB	AB	AB	AB	AB	AB	AB
03-002-97	a550817.4325015.052018.686_D02.CEL	AA	AA	AA	AA	AA	AA	AA	AA	AA	AA	AA	AA	AA	AA	AA	AA	AA	AA	AA	AA	AA	AA	AA	AA	AA	AA	AA	AA	AA	AA	AA	AA	AA	AA	AA	AA	AA	AA	AA	AA	AA	AA	AA	AA	AA	AA	AA	AA
03-002-24	a550817.4325015.052018.686_D07.CEL	AA	AA	AA	AA	AA	AA	AA	AA	AA	AA	AA	AA	AA	AA	AA	AA	AA	AA	AA	AA	AA	AA	AA	AA	AA	AA	AA	AA	AA	AA	AA	AA	AA	AA	AA	AA	AA	AA	AA	AA	AA	AA	AA	AA	AA	AA	AA	AA
03-002-38	a550817.4325015.052018.686_D08.CEL	AA	AA	AA	AA	AA	AA	AA	AA	AA	AA	AA	AA	AA	AA	AA	AA	AA	AA	AA	AA	AA	AA	AA	AA	AA	AA	AA	AA	AA	AA	AA	AA	AA	AA	AA	AA	AA	AA	AA	AA	AA	AA	AA	AA	AA	AA	AA	AA
03-002-50	a550817.4325015.052018.686_D09.CEL	AA	AA	AA	AA	AA	AA	AA	AA	AA	AA	AA	AA	AA	AA	AA	AA	AA	AA	AA	AA	AA	AA	AA	AA	AA	AA	AA	AA	AA	AA	AA	AA	AA	AA	AA	AA	AA	AA	AA	AA	AA	AA	AA	AA	AA	AA	AA	AA
03-002-74	a550817.4325015.052018.686_D10.CEL	AA	AA	AA	AA	AA	AA	AA	AA	AA	AA	AA	AA	AA	AA	AA	AA	AA	AA	AA	AA	AA	AA	AA	AA	AA	AA	AA	AA	AA	AA	AA	AA	AA	AA	AA	AA	AA	AA	AA	AA	AA	AA	AA	AA	AA	AA	AA	AA
03-002-98	a550817.4325015.052018.686_D12.CEL	AA	AA	AA	AA	AA	AA	AA	AA	AA	AA	AA	AA	AA	AA	AA	AA	AA	AA	AA	AA	AA	AA	AA	AA	AA	AA	AA	AA	AA	AA	AA	AA	AA	AA	AA	AA	AA	AA	AA	AA	AA	AA	AA	AA	AA	AA	AA	AA
03-002-27	a550817.4325015.052018.686_E05.CEL	AA	AA	AA	AA	AA	AA	AA	AA	AA	AA	AA	AA	AA	AA	AA	AA	AA	AA	AA	AA	AA	AA	AA	AA	AA	AA	AA	AA	AA	AA	AA	AA	AA	AA	AA	AA	AA	AA	AA	AA	AA	AA	AA	AA	AA	AA	AA	AA
03-002-15	a550817.4325015.052018.686_F01.CEL	AB	AB	AB	AB	AB	AB	AB	AB	AB	AB	AB	AB	AB	AB	AB	AB	AB	AB	AB	AB	AB	AB	AB	AB	AB	AB	AB	AB	AB	AB	AB	AB	AB	AB	AB	AB	AB	AB	AB	AB	AB	AB	AB	AB	AB	AB	AB	AB
03-002-30	a550817.4325015.052018.686_F02.CEL	AA	AA	AA	AA	AA	AA	AA	AA	AA	AA	AA	AA	AA	AA	AA	AA	AA	AA	AA	AA	AA	AA	AA	AA	AA	AA	AA	AA	AA	AA	AA	AA	AA	AA	AA	AA	AA	AA	AA	AA	AA	AA	AA	AA	AA	AA	AA	AA
03-002-40	a550817.4325015.052018.686_F03.CEL	AB	AB	AB	AB	AB	AB	AB	AB	AB	AB	AB	AB	AB	AB	AB	AB	AB	AB	AB	AB	AB	AB	AB	AB	AB	AB	AB	AB	AB	AB	AB	AB	AB	AB	AB	AB	AB	AB	AB	AB	AB	AB	AB	AB	AB	AB	AB	AB
03-002-101	a550817.4325015.052018.686_F07.CEL	AA	AA	AA	AA	AA	AA	AA	AA	AA	AA	AA	AA	AA	AA	AA	AA	AA	AA	AA	AA	AA	AA	AA	AA	AA	AA	AA	AA	AA	AA	AA	AA	AA	AA	AA	AA	AA	AA	AA	AA	AA	AA	AA	AA	AA	AA	AA	AA
03-002-43	a550817.4325015.052018.686_G01.CEL	AB	AB	AB	AB	AB	AB	AB	AB	AB	AB	AB	AB	AB	AB	AB	AB	AB	AB	AB	AB	AB	AB	AB	AB	AB	AB	AB	AB	AB	AB	AB	AB	AB	AB	AB	AB	AB	AB	AB	AB	AB	AB	AB	AB	AB	AB	AB	AB
03-002-102	a550817.4325015.052018.686_G03.CEL	AA	AA	AA	AA	AA	AA	AA	AA	AA	AA	AA	AA	AA	AA	AA	AA	AA	AA	AA	AA	AA	AA	AA	AA	AA	AA	AA	AA	AA	AA	AA	AA	AB	AB	AB	AB	AB	AB	AB	AB	AB	AB	AB	AB	AB	AB	AB	AB
03-002-19	a550817.4325015.052018.686_G07.CEL	AB	AB	AB	AB	AB	AB	AB	AB	AB	AB	AB	AB	AB	AB	AB	AB	AB	AB	AB	AB	AB	AB	AB	AB	AB	AB	AB	AB	AB	AB	AB	AB	AB	AB	AB	AB	AB	AB	AB	AB	AB	AB	AB	AB	AB	AB	AA	AA
03-002-34	a550817.4325015.052018.686_G08.CEL	AA	AA	AA	AA	AA	AA	AA	AA	AA	AA	AA	AA	AA	AA	AA	AA	AA	AA	AA	AA	AA	AA	AA	AA	AA	AA	AA	AA	AA	AA	AA	AA	AA	AA	AA	AA	AA	AA	AA	AA	AA	AA	AA	AA	AA	AA	AA	AA
03-002-44	a550817.4325015.052018.686_G09.CEL	AB	AB	AB	AB	AB	AB	AB	AB	AB	AB	AB	AB	AB	AB	AB	AB	AB	AB	AB	AB	AB	AB	AB	AB	AB	AB	AB	AB	AB	AB	AB	AB	AB	AB	AB	AB	AB	AB	AB	AB	AB	AB	AB	AB	AB	AB	AB	AB
03-002-58	a550817.4325015.052018.686_G10.CEL	AA	AA	AA	AA	AA	AA	AA	AA	AA	AA	AA	AA	AA	AA	AA	AA	AA	AA	AA	AA	AA	AA	AA	AA	AA	AA	AA	AA	AA	AA	AA	AA	AA	AA	AA	AA	AA	AA	AA	AA	AA	AA	AA	AA	AA	AA	AA	AA
03-002-103	a550817.4325015.052018.686_G12.CEL	AA	AA	AA	AA	AA	AA	AA	AA	AA	AA	AA	AA	AA	AA	AA	AA	AA	AA	AA	AA	AA	AA	AA	AA	AA	AA	AA	AA	AA	AA	AA	AA	AA	AA	AA	AA	AA	AA	AA	AA	AA	AA	AA	AA	AA	AA	AA	AA
03-002-45	a550817.4325015.052018.686_H05.CEL	AA	AA	AA	AA	AA	AA	AA	AA	AA	AA	AA	AA	AA	AA	AA	AA	AA	AA	AA	AA	AA	AA	AA	AA	AA	AA	AA	AA	AA	AA	AA	AA	AA	AA	AA	AA	AA	AA	AA	AA	AA	AA	AA	AA	AA	AA	AA	AA
03-002-59	a550817.4325015.052018.686_H06.CEL	AB	AB	AB	AB	AB	AB	AB	AB	AB	AB	AB	AB	AB	AB	AB	AB	AB	AB	AB	AB	AB	AB	AB	AB	AB	AB	AB	AB	AB	AB	AB	AB	AB	AB	AB	AB	AB	AB	AB	AB	AB	AB	AB	AB	AB	AB	AB	AB
03-002-80	a550817.4325015.052018.686_H08.CEL	AB	AB	AB	AB	AB	AB	AB	AB	AB	AB	AB	AB	AB	AB	AB	AB	AB	AB	AB	AB	AB	AB	AB	AB	AB	AB	AB	AB	AB	AB	AB	AB	AB	AB	AB	AB	AB	AB	AB	AB	AB	AB	AB	AB	AB	AB	AB	AB
05-011-84	a550817.4325015.052018.686_H10.CEL	AB	AB	AB	AB	AB	AB	AB	AB	AB	AB	AB	AB	AB	AB	AB	AB	AB	AB	AB	AB	AB	AA	AA	AA	AA	AA	AA	AA	AA	AA	AA	AA	AA	AA	AA	AA	AA	AA	AA	AA	AA	AA	AA	AA	AA	AA	AA	AA
06-033-13	a550817.4325015.052018.687_G03.CEL	AB	AB	AB	AB	AB	AB	AB	AB	AB	AB	AB	AB	AB	AB	AB	AB	AB	AB	AB	AB	AB	AB	AB	AB	AB	AB	AB	AB	AB	AB	AB	AB	AB	AB	AB	AB	AB	AB	AB	AA	AA	AA	AA	AA	AA	AA	AA	AA
06-033-84	a550817.4325015.052018.687_G05.CEL	AA	AA	AA	AA	AA	AA	AA	AA	AA	AA	AA	AA	AA	AA	AA	AA	AA	AA	AA	AA	AA	AA	AA	AA	AA	AA	AA	AA	AA	AA	AA	AA	AA	AA	AA	AA	AA	AA	AA	AA	AA	AA	AA	AA	AA	AA	AA	AA
06-033-88	a550817.4325015.052018.688_F06.CEL	AA	AA	AA	AA	AA	AA	AA	AA	AA	AA	AA	AA	AA	AA	AA	AA	AA	AA	AA	AA	AA	AA	AA	AA	AA	AA	AA	AA	AA	AA	AA	AA	AA	AA	AA	AA	AA	AA	AA	AA	AA	AA	AA	AA	AA	AA	AA	AA
06-033-2	a550817.4325015.052018.688_F07.CEL	AB	AB	AB	AB	AB	AB	AB	AB	AB	AB	AB	AB	AB	AB	AB	AB	AB	AB	AB	AB	AB	AB	AB	AB	AB	AB	AB	AB	AB	AB	AB	AB	AB	AB	AB	AB	AB	AB	AB	AB	AB	AB	AB	AB	AB	AB	AB	AB
06-033-19	a550817.4325015.052018.688_F08.CEL	AB	AB	AB	AB	AB	AB	AB	AB	AB	AB	AB	AB	AB	AB	AB	AB	AB	AB	AB	AB	AB	AB	AB	AB	AB	AB	AB	AB	AB	AB	AB	AB	AB	AB	AB	AB	AB	AB	AB	AB	AB	AB	AB	AB	AB	AB	AB	AB
06-033-52	a550817.4325015.052018.688_F09.CEL	AA	AA	AA	AA	AA	AA	AA	AA	AA	AA	AA	AA	AA	AA	AA	AA	AA	AA	AA	AA	AA	AA	AA	AA	AA	AA	AA	AA	AA	AA	AA	AA	AA	AA	AA	AA	AA	AA	AA	AA	AA	AA	AA	AA	AA	AA	AA	AA
06-033-32	a550817.4325015.052018.688_G06.CEL	AB	AB	AB	AB	AB	AB	AB	AB	AB	AB	AB	AB	AB	AB	AB	AB	AB	AB	AB	AB	AB	AB	AB	AA	AA	AA	AA	AA	AA	AA	AA	AA	AA	AA	AA	AA	AA	AA	AA	AA	AA	AA	AA	AA	AA	AA	AA	AA
06-033-27	a550817.4325015.052018.688_G08.CEL	AA	AA	AA	AA	AA	AA	AA	AA	AA	AA	AA	AA	AA	AA	AA	AA	AA	AA	AA	AA	AA	AB	AB	AB	AB	AB	AB	AB	AB	AB	AB	AB	AB	AB	AB	AB	AB	AB	AB	AB	AB	AB	AB	AB	AB	AB	AB	AB
06-033-60	a550817.4325015.052018.688_G09.CEL	AB	AB	AB	AB	AB	AB	AB	AB	AB	AB	AB	AB	AB	AB	AB	AB	AB	AB	AB	AB	AB	AB	AB	AB	AB	AB	AB	AB	AB	AB	AB	AB	AB	AB	AB	AB	AB	AB	AB	AB	AB	AB	AB	AB	AB	AB	AB	AB
06-033-64	a550817.4325015.052018.688_H06.CEL	AB	AB	AB	AB	AB	AB	AB	AB	AB	AB	AB	AB	AB	AB	AB	AB	AB	AB	AB	AB	AB	AB	AB	AB	AB	AB	AB	AB	AB	AB	AB	AB	AB	AB	AB	AB	AB	AB	AB	AB	AB	AB	AB	AB	AB	AB	AB	AB
06-033-26	a550817.4325015.052018.688_H07.CEL	AA	AA	AA	AA	AA	AA	AA	AA	AA	AA	AA	AA	AA	AA	AA	AA	AA	AA	AA	AA	AA	AA	AA	AA	AA	AA	AA	AA	AA	AA	AA	AA	AA	AB	AB	AB	AB	AB	AB	AB	AB	AB	AB	AB	AB	AB	AB	AB
06-033-35	a550817.4325015.052018.688_H08.CEL	AB	AB	AB	AB	AB	AB	AB	AB	AB	AB	AB	AB	AB	AB	AB	AB	AB	AB	AB	AB	AB	AB	AB	AB	AB	AB	AB	AB	AB	AB	AB	AB	AB	AB	AB	AB	AB	AB	AB	AB	AB	AB	AB	AB	AB	AB	AB	AB
06-033-94	a550817.4325015.052018.688_H10.CEL	AB	AA	AA	AA	AA	AA	AA	AA	AA	AA	AA	AA	AA	AA	AA	AA	AA	AA	AA	AA	AA	AA	AA	AA	AA	AA	AA	AA	AA	AA	AA	AA	AA	AA	AA	AA	AA	AA	AA	AA	AA	AA	AA	AA	AA	AA	AA	AA
03-002-8	a550817.4325015.052018.690_A02.CEL	AB	AB	AB	AB	AB	AB	AB	AB	AB	AB	AB	AB	AB	AB	AB	AB	AB	AB	AB	AB	AB	AB	AB	AB	AB	AB	AB	AB	AB	AB	AB	AB	AB	AB	AB	AB	AB	AB	AB	AB	AB	AB	AB	AB	AB	AB	AB	AB
03-002-22	a550817.4325015.052018.690_A03.CEL	AA	AA	AA	AA	AA	AA	AA	AA	AA	AA	AA	AA	AA	AA	AA	AA	AA	AA	AA	AA	AA	AA	AA	AA	AA	AA	AA	AA	AA	AA	AA	AA	AA	AA	AA	AA	AA	AA	AA	AA	AA	AA	AA	AA	AA	AA	AA	AA
03-002-36	a550817.4325015.052018.690_A04.CEL	AA	AA	AA	AA	AA	AA	AA	AA	AA	AA	AA	AA	AA	AA	AA	AA	AA	AA	AA	AA	AA	AA	AA	AA	AA	AA	AA	AA	AA	AA	AA	AA	AA	AA	AA	AA	AA	AA	AA	AA	AA	AA	AA	AA	AA	AA	AA	AA
03-002-46	a550817.4325015.052018.690_A05.CEL	AB	AB	AB	AB	AB	AB	AB	AB	AB	AB	AB	AB	AB	AB	AB	AB	AB	AB	AB	AB	AB	AB	AB	AB	AB	AB	AB	AB	AB	AB	AB	AB	AB	AB	AB	AB	AB	AB	AB	AB	AB	AB	AB	AB	AB	AB	AB	AB
07-033-103	a550817.4325015.052018.690_C01.CEL	AB	AB	AB	AB	AB	AB	AB	AB	AB	AB	AB	AB	AB	AB	AB	AB	AB	AB	AB	AB	AB	AB	AB	AB	AB	AB	AB	AB	AB	AB	AB	AB	AB	AB	AB	AB	AB	AB	AB	AB	AB	AB	AB	AB	AB	AB	AB	AB
06-033-14	a550817.4325015.052018.692_G08.CEL	AB	AB	AB	AB	AB	AB	AB	AB	AB	AB	AB	AB	AB	AB	AB	AB	AB	AB	AB	AB	AB	AB	AA	AA	AA	AA	AA	AA	AA	AA	AA	AA	AA	AA	AA	AA	AA	AA	AA	AA	AA	AA	AA	AA	AA	AA	AA	AA
06-033-22	a550817.4325015.052018.692_G09.CEL	AB	AB	AB	AB	AB	AB	AB	AB	AB	AB	AB	AB	AB	AB	AB	AB	AB	AB	AB	AB	AB	AB	AB	AB	AB	AB	AB	AB	AB	AB	AB	AB	AB	AB	AB	AB	AB	AB	AB	AB	AB	AB	AB	AB	AB	AB	AB	AB
06-033-46	a550817.4325015.052018.692_G10.CEL	AA	AA	AA	AA	AA	AA	AA	AA	AA	AA	AA	AA	AA	AA	AA	AA	AA	AA	AA	AA	AA	AA	AA	AA	AA	AA	AA	AA	AA	AA	AA	AA	AA	AA	AA	AA	AA	AA	AA	AA	AA	AA	AA	AA	AA	AA	AA	AA
06-033-87	a550817.4325015.052018.692_G12.CEL	AB	AB	AB	AB	AB	AB	AB	AB	AB	AB	AB	AB	AB	AB	AB	AB	AB	AB	AB	AB	AB	AB	AB	AB	AB	AB	AB	AB	AB	AB	AB	AB	AB	AB	AB	AB	AB	AB	AB	AB	AB	AB	AB	AB	AB	AB	AB	AB
06-033-15	a550817.4325015.052018.692_H02.CEL	AA	AA	AA	AA	AA	AA	AA	AA	AA	AA	AA	AA	AA	AA	AA	AA	AA	AA	AA	AA	AA	AA	AA	AA	AA	AA	AA	AA	AA	AA	AA	AA	AA	AA	AA	AA	AA	AA	AA	AA	AA	AA	AA	AA	AA	AA	AA	AA
06-033-31	a550817.4325015.052018.692_H03.CEL	AB	AB	AB	AB	AB	AB	AB	AB	AB	AB	AB	AB	AB	AB	AB	AB	AB	AB	AB	AB	AB	AB	AB	AB	AB	AB	AB	AB	AB	AB	AB	AB	AB	AB	AB	AB	AB	AB	AB	AB	AB	AB	AB	AB	AB	AB	AB	AB
06-033-39	a550817.4325015.052018.692_H04.CEL	AB	AB	AB	AB	AB	AB	AB	AB	AB	AB	AB	AB	AB	AB	AB	AB	AB	AB	AA	AA	AA	AA	AA	AA	AA	AA	AA	AA	AA	AA	AA	AA	AA	AA	AA	AA	AA	AA	AA	AA	AA	AA	AA	AA	AA	AA	AA	AA
06-033-47	a550817.4325015.052018.692_H05.CEL	AA	AA	AA	AA	AA	AA	AA	AA	AA	AA	AA	AA	AA	AA	AA	AA	AA	AA	AA	AA	AA	AA	AA	AA	AA	AA	AA	AA	AB	AB	AB	AB	AB	AB	AB	AB	AB	AB	AB	AB	AB	AB	AB	AB	AB	AB	AB	AB
06-033-55	a550817.4325015.052018.692_H06.CEL	AB	AB	AB	AB	AB	AB	AB	AB	AB	AB	AB	AB	AB	AB	AB	AB	AB	AB	AB	AB	AB	AB	AB	AB	AB	AB	AB	AB	AB	AB	AB	AB	AB	AB	AB	AB	AB	AB	AB	AB	AB	AB	AB	AB	AB	AB	AB	AB
06-033-71	a550817.4325015.052018.692_H07.CEL	AB	AB	AB	AB	AB	AB	AB	AB	AB	AB	AB	AB	AB	AB	AB	AB	AB	AB	AB	AB	AB	AB	AB	AB	AB	AB	AB	AB	AB	AB	AB	AB	AB	AB	AB	AB	AB	AB	AB	AB	AB	AB	AB	AB	AB	AB	AB	AB
06-033-80	a550817.4325015.052018.692_H08.CEL	AB	AB	AB	AB	AB	AB	AB	AB	AB	AB	AB	AB	AB	AB	AA	AA	AA	AA	AA	AA	AA	AA	AA	AA	AA	AA	AA	AA	AA	AA	AA	AA	AA	AA	AA	AA	AA	AA	AA	AA	AA	AA	AA	AA	AA	AA	AA	AA
06-033-8	a550817.4325015.052018.692_H10.CEL	AB	AB	AB	AB	AB	AB	AB	AB	AB	AB	AB	AB	AB	AB	AB	AB	AB	AB	AB	AB	AB	AB	AB	AB	AB	AB	AB	AB	AB	AB	AB	AB	AB	AB	AB	AB	AB	AB	AB	AB	AB	AB	AB	AB	AB	AB	AB	AB
06-033-16	a550817.4325015.052018.692_H11.CEL	AB	AB	AB	AB	AB	AB	AB	AB	AB	AB	AB	AB	AB	AB	AB	AB	AB	AB	AB	AB	AB	AB	AB	AB	AB	AB	AB	AB	AB	AB	AB	AA	AA	AA	AA	AA	AA	AA	AA	AA	AA	AA	AA	AA	AA	AA	AA	AA
06-033-24	a550817.4325015.052018.692_H12.CEL	AB	AB	AB	AB	AB	AB	AB	AB	AA	AA	AA	AA	AA	AA	AA	AA	AA	AA	AA	AA	AA	AA	AA	AA	AA	AA	AA	AA	AA	AA	AA	AA	AA	AA	AA	AA	AA	AA	AA	AA	AA	AA	AA	AA	AA	AA	AA	AA
06-033-34	a550817.4325015.052018.693_A07.CEL	AB	AB	AB	AB	AB	AB	AB	AB	AB	AB	AB	AB	AB	AB	AB	AB	AB	AB	AB	AB	AB	AB	AB	AB	AB	AB	AB	AB	AB	AB	AB	AB	AB	AB	AB	AB	AB	AB	AB	AB	AB	AB	AB	AB	AB	AB	AB	AB
06-033-77	a550817.4325015.052018.693_A09.CEL	AA	AA	AA	AA	AA	AA	AA	AA	AA	AA	AA	AA	AA	AA	AA	AA	AA	AA	AA	AA	AA	AA	AA	AA	AA	AA	AA	AA	AA	AA	AA	AA	AA	AA	AA	-	AA	AA	AA	AA	AA	AA	AA	AA	AA	AA	AA	AA
03-002-23	a550817.4325015.052018.693_A10.CEL	AA	AA	AA	AA	AA	AA	AA	AA	AA	AA	AA	AA	AA	AA	AA	AA	AA	AA	AA	AA	AA	AA	AA	AA	AA	AA	AA	AA	AA	AA	AA	AA	AA	AA	AA	AA	AA	AA	AA	AA	AA	AA	AA	AA	AA	AA	AA	AA
06-033-30	a550817.4325015.052018.693_B05.CEL	AB	AB	AB	AB	AB	AB	AB	AB	AB	AB	AB	AB	AB	AB	AB	AB	AB	AB	AB	AB	AB	AB	AB	AB	AB	AB	AB	AB	AB	AB	AB	AB	AB	AB	AB	AB	AB	AB	AB	AB	AB	AB	AB	AB	AB	AB	AB	AB
06-033-42	a550817.4325015.052018.693_B07.CEL	AB	AB	AB	AB	AB	AB	AB	AB	AA	AA	AA	AA	AA	AA	AA	AA	AA	AA	AA	AA	AA	AA	AA	AA	AA	AA	AA	AA	AA	AA	AA	AA	AA	AA	AA	AA	AA	AA	AA	AA	AA	AA	AA	AA	AA	AA	AA	AA
06-033-20	a550817.4325015.052018.693_B08.CEL	AA	AA	AA	AA	AA	AA	AA	AA	AA	AA	AA	AA	AA	AA	AA	AA	AA	AA	AA	AA	AA	AA	AA	AA	AA	AA	AA	AA	AA	AA	AA	AA	AA	AA	AA	AA	AA	AA	AA	AA	AA	AA	AA	AA	AA	AA	AA	AA
06-033-85	a550817.4325015.052018.693_B09.CEL	AA	AA	AA	AA	AA	AA	AA	AA	AA	AA	AA	AA	AA	AA	AA	AA	AA	AA	AA	AA	AA	AA	AA	AA	AA	AA	AA	AA	AA	AA	AA	AA	AA	AA	AA	AA	AA	AA	AA	AA	AA	AA	AA	AA	AA	AA	AA	AA
06-033-54	a550817.4325015.052018.693_C04.CEL	AA	AA	AA	AA	AA	AA	AA	AA	AA	AA	AA	AA	AA	AA	AA	AA	AA	AA	AA	AA	AA	AA	AA	AA	AA	AA	AA	AA	AA	AA	AA	AA	AA	AA	AA	AA	AA	AA	AA	AA	AA	AA	AA	AA	AA	AA	AA	AA
06-033-65	a550817.4325015.052018.693_C05.CEL	AA	AA	AA	AA	AA	AA	AA	AA	AA	AA	AA	AA	AA	AA	AA	AA	AA	AA	AA	AA	AA	AA	AA	AA	AA	AA	AA	AA	AA	AA	AA	AA	AA	AA	AA	AA	AA	AA	AA	AA	AA	AA	AA	AA	AA	AA	AA	AA
06-033-50	a550817.4325015.052018.693_C06.CEL	AB	AB	AB	AB	AB	AB	AB	AB	AB	AB	AB	AB	AB	AB	AB	AB	AB	AB	AB	AB	AB	AB	AB	AB	AB	AB	AB	AB	AB	AB	AB	AB	AB	AB	AB	AB	AB	AB	AB	AB	AB	AB	AB	AB	AB	AB	AB	AB
06-033-28	a550817.4325015.052018.693_C07.CEL	AA	AA	AA	AA	AA	AA	AA	AA	AA	AA	AA	AA	AA	AA	AA	AA	AA	AA	AA	AA	AA	AA	AA	AA	AA	AA	AA	AA	AA	AA	AA	AA	AA	AA	AA	AA	AA	AA	AA	AA	AA	AA	AA	AA	AA	AA	AA	AA
06-033-93	a550817.4325015.052018.693_C08.CEL	AB	AB	AB	AB	AB	AB	AB	AB	AB	AB	AB	AB	AB	AB	AB	AB	AB	AB	AB	AB	AB	AB	AB	AB	AB	AB	AB	AB	AB	AB	AB	AB	AB	AB	AB	AB	AB	AA	AA	AA	AA	AA	AA	AA	AA	AA	AA	AA
03-002-56	a550817.4325015.052018.693_C09.CEL	AB	AB	AB	AB	AB	AB	AB	AB	AB	AB	AB	AB	AB	AB	AB	AB	AB	AB	AB	AB	AB	AB	AB	AB	AB	AB	AB	AB	AB	AB	AB	AB	AB	AB	AB	AB	AB	AB	AB	AB	AB	AB	AB	AB	AB	AB	AB	AB
06-033-82	a550817.4325015.052018.693_D05.CEL	AB	AB	AB	AB	AB	AB	AB	AB	AB	AB	AB	AB	AB	AB	AB	AB	AB	AB	AB	AB	AB	AB	AB	AB	AB	AB	AB	AB	AB	AB	AB	AB	AB	AB	AB	AB	AA	AA	AA	AA	AA	AA	AA	AA	AA	AA	AA	AA
06-033-66	a550817.4325015.052018.693_D06.CEL	AB	AB	AB	AB	AB	AB	AB	AB	AB	AB	AB	AB	AB	AB	AB	AB	AB	AB	AB	AB	AB	AB	AB	AB	AB	AB	AB	AB	AB	AB	AB	AB	AB	AB	AB	AB	AB	AB	AB	AB	AB	AB	AB	AB	AB	AB	AB	AB
06-033-36	a550817.4325015.052018.693_D07.CEL	AB	AB	AB	AB	AB	AB	AB	AB	AB	AB	AB	AB	AB	AB	AB	AB	AB	AB	AB	AB	AA	AA	AA	AA	AA	AA	AA	AA	AA	AA	AA	AA	AA	AA	AA	AA	AA	AA	AA	AA	AA	AA	AA	AA	AA	AA	AA	AA
03-002-70	a550817.4325015.052018.693_D09.CEL	AB	AB	AB	AB	AB	AB	AB	AB	AB	AB	AB	AB	AB	AB	AB	AB	AB	AB	AB	AB	AB	AB	AB	AA	AA	AA	AA	AA	AA	AA	AA	AA	AA	AA	AA	AA	AA	AA	AA	AA	AA	AA	AA	AA	AA	AA	AA	AA
06-033-63	a550817.4325015.052018.693_E04.CEL	AA	AA	AA	AA	AA	AA	AA	AA	AA	AA	AA	AA	AA	AA	AA	AA	AA	AA	AA	AA	AA	AA	AA	AA	AA	AA	AA	AA	AA	AA	AA	AA	AA	AA	AA	AA	AA	AA	AA	AA	AA	AA	AA	AA	AA	AA	AA	AA
06-033-90	a550817.4325015.052018.693_E05.CEL	AB	AB	AB	AB	AB	AB	AB	AB	AB	AB	AB	AB	AB	AB	AB	AB	AB	AB	AB	AB	AB	AB	AB	AB	AB	AB	AB	AB	AB	AB	AB	AB	AB	AB	AB	AB	AB	AB	AB	AB	AB	AB	AB	AB	AB	AB	AB	AB
06-033-91	a550817.4325015.052018.693_E06.CEL	AA	AA	AA	AA	AA	AA	AA	AA	AA	AA	AA	AA	AA	AA	AA	AA	AA	AA	AA	AA	AA	AA	AA	AA	AA	AA	AA	AA	AA	AA	AA	AA	AA	AA	AA	AA	AA	AA	AA	AA	AA	AA	AA	AA	AA	AA	AA	AA
06-033-44	a550817.4325015.052018.693_E07.CEL	AA	AA	AA	AA	AA	AA	AA	AA	AA	AA	AA	AA	AA	AA	AA	AA	AA	AA	AA	AA	AA	AA	AA	AA	AA	AA	AA	AA	AA	AA	AA	AA	AA	AA	AA	AA	AA	AA	AA	AA	AA	AA	AA	AA	AA	AA	AA	AA
06-033-53	a550817.4325015.052018.693_E08.CEL	AA	AA	AA	AA	AA	AA	AA	AA	AA	AA	AA	AA	AA	AA	AA	AA	AA	AA	AA	AA	AA	AA	AA	AA	AA	AA	AA	AA	AA	AA	AA	AA	AA	AA	AA	AA	AA	AA	AA	AA	AA	AA	AA	AA	AA	AA	AA	AA
07-033-61	a550817.4325016.052018.798_A12.CEL	AB	AB	AB	AB	AB	AB	AB	AB	AB	AB	AB	AB	AB	AB	AB	AB	AB	AB	AB	AB	AB	AB	AB	AB	AB	AB	AB	AB	AB	AB	AB	AB	AB	AB	AB	AB	AB	AB	AB	AB	AB	AB	AB	AB	AB	AB	AB	AB
06-033-97	a550817.4325016.052018.799_G10.CEL	AB	AB	AB	AB	AB	AB	AB	AB	AB	AB	AB	AB	AB	AB	AB	AB	AB	AB	AB	AB	AB	AB	AB	AB	AB	AB	AB	AB	AB	AB	AB	AB	AB	AB	AB	AB	AB	AB	AB	AB	AB	AB	AB	AB	AB	AB	AB	AB
07-033-92	a550817.4345742.120218.220_A02.CEL	AA	AA	AA	AA	AA	AA	AA	AA	AA	AA	AA	AA	AA	AA	AA	AA	AA	AA	AA	AA	AA	AA	AA	AA	AA	AA	AA	AA	AA	AA	AA	AA	AA	AA	AA	AA	AA	AA	AA	AA	AA	AA	AA	AA	AA	AA	AA	AA
07-033-95	a550817.4345742.120218.220_B02.CEL	AB	AB	AB	AB	AB	AB	AB	AB	AB	AB	AB	AB	AB	AB	AB	AB	AB	AB	AB	AB	AB	AB	AB	AB	AB	AB	AB	AB	AB	AB	AB	AB	AB	AB	AB	AB	AB	AB	AB	AB	AB	AB	AB	AB	AB	AB	AB	AB
07-033-97	a550817.4345742.120218.220_C02.CEL	AB	AB	AB	AB	AB	AB	AB	AB	AB	AB	AB	AB	AB	AB	AB	AB	AB	AB	AB	AB	AB	AB	AB	AB	AB	AB	AB	AB	AB	AB	AA	AA	AA	AA	AA	AA	AA	AA	AA	AA	AA	AA	AA	AA	AA	AA	AA	AA
07-033-79	a550817.4345742.120218.220_D01.CEL	AB	AB	AB	AB	AB	AB	AB	AB	AB	AB	AB	AB	AB	AB	AB	AB	AB	AB	AB	AB	AB	AB	AB	AB	AB	AB	AB	AB	AB	AB	AB	AB	AB	AB	AB	AB	AB	AB	AB	AB	AB	AB	AB	AB	AB	AB	AB	AA
07-033-83	a550817.4345742.120218.220_E01.CEL	AA	AA	AA	AA	AA	AA	AA	AA	AA	AB	AB	AB	AB	AB	AB	AB	AB	AB	AB	AB	AB	AB	AB	AB	AB	AB	AB	AB	AB	AB	AB	AB	AB	AB	AB	AB	AB	AA	AA	AA	AA	AA	AA	AA	AA	AA	AA	AA
07-033-39	a550817.4345742.120218.220_F09.CEL	AA	AA	AA	AA	AA	AA	AA	AA	AA	AA	AA	AA	AA	AA	AA	AA	AA	AA	AA	AA	AA	AA	AA	AA	AA	AA	AA	AA	AA	AA	AA	AA	AA	AA	AA	AA	AA	AA	AA	AA	AA	AA	AA	AA	AA	AA	AA	AA
07-033-15	a550817.4345742.120218.221_B02.CEL	AA	AA	AA	AA	AA	AA	AA	AA	AA	AA	AA	AA	AA	AA	AA	AA	AA	AA	AA	AA	AA	AA	AA	AA	AA	AA	AA	AA	AA	AA	AA	AA	AA	AA	AA	AA	AA	AA	AA	AA	AA	AA	AA	AA	AA	AA	AA	AA
07-033-98	a550817.4345742.120218.221_C02.CEL	AB	AB	AB	AB	AB	AB	AB	AB	AB	AB	AB	AB	AB	AB	AB	AB	AB	AB	AB	AB	AB	AB	AB	AB	AB	AB	AB	AB	AB	AB	AB	AB	AB	AB	AB	AB	AB	AB	AB	AB	AB	AB	AB	AB	AB	AB	AB	AB
03-002-17	a550817.4345742.120218.222_E01.CEL	AB	AB	AB	AB	AB	AB	AB	AB	AB	AB	AB	AB	AB	AB	AB	AB	AB	AB	AB	AB	AB	AB	AB	AB	AB	AB	AB	AB	AB	AB	AB	AB	AB	AB	AB	AB	AB	AB	AB	AB	AB	AB	AB	AB	AB	AB	AB	AB
03-002-21	a550817.4345742.120218.222_E02.CEL	AB	AB	AB	AB	AB	AB	AB	AB	AB	AB	AB	AB	AB	AB	AB	AB	AB	AB	AB	AB	AB	AB	AB	AB	AB	AB	-	AB	AB	AB	AB	AB	AB	AB	AB	AB	AB	AB	AB	AB	AB	AB	AB	AB	AB	AB	AB	AB
03-002-35	a550817.4345742.120218.222_E03.CEL	AA	AA	AA	AA	AA	AA	AA	AA	AA	AA	AA	AA	AA	-	AA	AA	AA	AA	AA	AA	AA	AA	AA	AA	AA	AA	AA	AA	AA	AA	AA	AA	AA	AA	AA	AA	AA	AA	AA	AA	AA	AA	AA	AA	AA	AA	AA	AA
05-011-86	a550817.4345742.120218.222_E08.CEL	AA	AA	AA	AA	AA	AA	AA	AA	AA	AA	AA	AA	AA	AA	AA	AA	AA	AA	AA	AA	AA	AA	AA	AA	AA	AA	AA	AA	AA	AA	AA	AA	AA	AA	AA	AA	AA	AA	AB	AB	AB	AB	AB	AB	AB	AB	AB	AB
05-011-87	a550817.4345742.120218.222_E09.CEL	AB	AB	AB	AB	AB	AB	AB	AB	AB	AB	AB	AB	AB	AB	AB	AB	AB	AB	AB	AB	AB	AB	AB	AB	AB	AB	AB	AB	AB	AB	AB	AB	AB	AB	AB	AB	AB	AB	AB	AB	AB	AB	AB	AB	AB	AB	AB	AB
06-033-5	a550817.4345742.120218.222_E11.CEL	AA	AA	AA	AA	AA	AA	AA	AA	AA	AA	AB	AB	AB	AB	AB	AB	AB	AB	AB	AB	AB	AB	AB	AB	AB	AB	AB	AB	AB	AB	AB	AB	AB	AB	AB	AB	AB	AB	AB	AB	AB	AB	AB	AB	AB	AB	AB	AB
06-033-6	a550817.4345742.120218.222_E12.CEL	AA	AA	AA	AA	AA	AA	AA	AA	AA	AA	AA	AA	AA	AA	AA	AA	AA	AA	AA	AA	AA	AA	AA	AB	AB	AB	AB	AB	AB	AB	AB	AB	AB	AB	AB	AB	AB	AB	AB	AB	AB	AB	AB	AB	AB	AB	AB	AB
06-033-18	a550817.4345742.120218.222_F01.CEL	AA	AA	AA	AA	AA	AA	AA	AA	AA	AA	AA	AA	AA	AA	AA	AA	AA	AA	AA	AA	AA	AA	AA	AA	AA	AA	AA	AA	AA	AA	AA	AA	AA	AA	AA	AA	AA	AA	AA	AA	AA	AA	AA	AA	AA	AA	AA	AA
06-033-37	a550817.4345742.120218.222_F02.CEL	AB	AB	AB	AB	AB	AB	AB	AB	AB	AB	AB	AB	AB	AB	AB	AB	AB	AB	AB	AB	AB	AB	AB	AB	AB	AB	AB	AB	AB	AB	AB	AB	AB	AB	AB	AB	AB	AB	AB	AB	AB	AB	AB	AB	AB	AB	AB	AB
06-033-68	a550817.4345742.120218.222_F03.CEL	AB	AB	AB	AB	AB	AB	AB	AB	AB	AB	AB	AB	AB	AB	AB	AB	AB	AB	AB	AB	AB	AB	AB	AB	AB	AB	AB	AB	AB	AB	AB	AB	AB	AB	AB	AB	AB	AB	AB	AB	AB	AB	AB	AB	AB	AB	AB	AB
06-033-69	a550817.4345742.120218.222_F04.CEL	AB	AB	AB	AB	AB	AB	AB	AB	AB	AB	AB	AB	AB	AB	AB	AB	AB	AB	AB	AB	AB	AB	AA	AA	AA	AA	AA	AA	AA	AA	AA	AA	AA	AA	AA	AA	AA	AA	AA	AA	AA	AA	AA	AA	AA	AA	AA	AA
06-033-86	a550817.4345742.120218.222_F06.CEL	AB	AB	AB	AB	AB	AB	AB	AB	AB	AB	AB	AB	AB	AB	AB	AB	AB	AB	AB	AB	AB	AB	AB	AB	AB	AB	AB	AB	AB	AB	AB	AB	AB	AB	AB	AB	AB	AB	AB	AB	AB	AB	AB	AB	AB	AB	AB	AB
07-033-1	a550817.4345742.120218.222_F08.CEL	AA	AA	AA	AA	AA	AA	AA	AA	AA	AA	AA	AA	AA	AA	AA	AA	AA	AA	AA	AA	AA	AA	AA	AA	AA	AA	AA	AA	AA	AB	AB	AB	AB	AB	AB	AB	AB	AB	AB	AB	AB	AB	AB	AB	AB	AB	AB	AB
07-033-2	a550817.4345742.120218.222_F09.CEL	AB	AB	AB	AB	AB	AB	AB	AB	AB	AB	AB	AB	AB	AB	AB	AB	AB	AB	AB	AB	AB	AB	AB	AB	AB	AB	AB	AB	AB	AB	AB	AB	AB	AB	AB	AB	AB	AB	AB	AB	AB	AB	AB	AB	AB	AB	AB	AB
07-033-7	a550817.4345742.120218.222_F11.CEL	AB	AB	AB	AB	AB	AB	AB	AB	AB	AB	AB	AB	AB	AB	AB	AB	AB	AB	AB	AB	AB	AA	AA	AA	AA	AA	AA	AA	AA	AA	AA	AA	AA	AA	AA	AA	AA	AA	AA	AA	AA	AA	AA	AA	AA	AA	AA	AA
07-033-8	a550817.4345742.120218.222_F12.CEL	AB	AB	AB	AB	AB	AB	AB	AB	AB	AB	AB	AB	AA	AA	AA	AA	AA	AA	AA	AA	AA	AA	AA	AA	AA	AA	AA	AA	AA	AA	AA	AA	AA	AA	AA	AA	AA	AA	AA	AB	AB	AB	AB	AB	AB	AB	AB	AB
07-033-10	a550817.4345742.120218.222_G01.CEL	AA	AA	AA	AA	AA	AA	AA	AA	AA	AA	AA	AA	AA	AA	AA	AA	AA	AA	AA	AA	AA	AA	AA	AA	AA	AA	AA	AA	AA	AA	AA	AA	AA	AA	AA	AA	AA	AA	AA	AA	AA	AA	AA	AA	AA	AA	AA	AA
07-033-12	a550817.4345742.120218.222_G02.CEL	AB	AB	AB	AB	AB	AB	AB	AB	AB	AB	AB	AB	AB	AB	AB	AB	AB	AB	AB	AB	AB	AB	AB	AB	AB	AB	AB	AB	AB	AB	AB	AB	AB	AB	AB	AB	AB	AB	AB	AB	AB	AB	AB	AB	AB	AB	AB	AB
07-033-19	a550817.4345742.120218.222_G04.CEL	AA	AA	AA	AA	AA	AA	AA	AA	AA	AA	AA	AA	AA	AA	AA	AA	AA	AA	AA	AA	AA	AA	AA	AA	AA	AA	AA	AA	AA	AA	AA	AA	AA	AA	AA	AA	AA	AA	AA	AA	AA	AA	AA	AA	AA	AA	AA	AA
07-033-21	a550817.4345742.120218.222_G05.CEL	AA	AA	AA	AA	AA	AA	AA	AA	AA	AA	AA	AA	AA	AA	AA	AA	AA	AA	AA	AA	AA	AA	AA	AA	AA	AA	AA	AA	AA	AA	AA	AA	AA	AA	AA	AA	AA	AA	AA	AA	AA	AA	AA	AA	AA	AA	AA	AA
07-033-22	a550817.4345742.120218.222_G06.CEL	AA	AA	AA	AA	AA	AA	AA	AA	AA	AA	AA	AA	AA	AA	AA	AA	AA	AA	AA	AA	AA	AA	AA	AA	AA	AA	AA	AA	AA	AA	AA	AA	AA	AA	AA	AA	AA	AA	AA	AA	AA	AA	AA	AA	AA	AA	AA	AA
07-033-36	a550817.4345742.120218.222_G11.CEL	AB	AB	AB	AB	AB	AB	AB	AB	AB	AB	AB	AB	AB	AB	AB	AB	AB	AB	AB	AB	AB	AB	AB	AB	AB	AB	AB	AB	AB	AB	AB	AB	AB	AB	AB	AB	AB	AB	AB	AB	AB	AB	AB	AB	AB	AB	AB	AB
[truncated: 1,788 more columns]

## Sheet: phenotypes
ID	Genotype	L.16	a.16	b.16	DFA.16	L.17	a.17	b.17	DFA.17	L	a	b	DFA
07-033-14	a550817.4325015.052018.683_A06.CEL	41.6925	8.97828	27.6572	1.2	42.2875	9.16994	28.6668	1.7	41.99	9.07411	28.162	1.45
07-033-6	a550817.4325015.052018.683_A07.CEL	42.3881	9.7216	28.2447	2	37.3092	10.7912	27.0928	2.2	39.8487	10.2564	27.6687	2.1
06-033-104	a550817.4325015.052018.683_A08.CEL	38.4282	11.9201	25.8513	2	33.8293	12.5194	24.7787	2	36.1287	12.2197	25.315	2
06-033-95	a550817.4325015.052018.683_A09.CEL	33.3897	13.5906	23.1076	2.6	30.7879	12.5012	25.0819	2.7	32.0888	13.0459	24.0947	2.65
07-033-99	a550817.4325015.052018.683_B03.CEL	29.0958	14.8219	18.4873	3	32.6629	12.4473	25.0329	3	30.8793	13.6346	21.7601	3
07-033-106	a550817.4325015.052018.683_B05.CEL	29.3151	15.815	20.312	2.8	31.2727	13.3386	21.719	2.88889	30.2939	14.5768	21.0155	2.84444
07-033-110	a550817.4325015.052018.683_B07.CEL	33.2668	13.5299	21.5424	-	38.9644	9.0494	25.9899	2.6	36.1156	11.2897	23.7661	2.6
07-033-109	a550817.4325015.052018.683_B08.CEL	34.9181	13.8073	24.5027	2.8	34.1353	11.6339	26.5318	2.8	34.5267	12.7206	25.5172	2.8
07-033-108	a550817.4325015.052018.683_B10.CEL	28.1352	15.3964	17.801	3	29.3112	13.6408	21.813	2.9	28.7232	14.5186	19.807	2.95
07-033-107	a550817.4325015.052018.683_B11.CEL	-	-	-	-	33.2231	12.1457	22.3307	2.5	33.2231	12.1457	22.3307	2.5
07-033-96	a550817.4325015.052018.683_C02.CEL	32.9808	13.0415	23.5216	2.8	32.3303	11.9594	22.9259	2.77778	32.6555	12.5005	23.2237	2.78889
07-033-105	a550817.4325015.052018.683_C04.CEL	31.5712	14.6207	23.0813	2.9	31.6676	13.4948	22.6434	-	31.6194	14.0578	22.8623	2.9
07-033-94	a550817.4325015.052018.683_C05.CEL	38.3202	10.6728	27.3667	2.7	44.2811	8.43142	28.5821	2	41.3006	9.5521	27.9744	2.35
07-033-112	a550817.4325015.052018.683_D01.CEL	42.6564	10.1974	26.5942	1.5	40.6242	8.64499	27.1121	2.1	41.6403	9.42117	26.8532	1.8
06-033-38	a550817.4325015.052018.684_B06.CEL	25.2819	6.38936	4.29076	2.2	38.6546	11.6115	30.0721	2.1	31.9683	9.00041	17.1815	2.15
06-033-23	a550817.4325015.052018.684_B09.CEL	37.228	10.6694	26.8103	2	42.2011	7.32239	29.4585	1.55556	39.7146	8.99589	28.1344	1.77778
06-033-3	a550817.4325015.052018.684_B10.CEL	34.307	12.9541	27.5156	2.1	40.6171	9.15751	30.0408	2.2	37.462	11.0558	28.7782	2.15
03-002-37	a550817.4325015.052018.684_C03.CEL	37.4767	10.9039	26.2776	2.3	37.642	11.3351	26.9036	2.33333	37.5593	11.1195	26.5906	2.31667
03-002-66	a550817.4325015.052018.684_C07.CEL	33.6397	13.039	23.1755	2.2	36.6324	9.26159	26.982	1.6	35.136	11.1503	25.0787	1.9
03-002-39	a550817.4325015.052018.684_C08.CEL	39.1251	11.6805	27.3266	2	38.1219	11.542	27.4247	1.8	38.6235	11.6112	27.3756	1.9
03-002-75	a550817.4325015.052018.684_C09.CEL	28.8526	13.0458	17.1754	2.9	37.7173	10.2898	25.7419	2.3	33.2849	11.6678	21.4586	2.6
03-002-78	a550817.4325015.052018.684_D01.CEL	29.2783	13.5314	22.3492	2.8	37.3298	10.7054	26.7679	2.2	33.3041	12.1184	24.5586	2.5
03-002-4	a550817.4325015.052018.684_D02.CEL	40.0364	10.097	28.0164	2	41.1705	8.19375	29.0954	1.7	40.6034	9.14537	28.5559	1.85
03-002-92	a550817.4325015.052018.684_D03.CEL	32.5003	14.2049	24.4876	2.5	33.504	12.4015	23.4241	2.7	33.0021	13.3032	23.9558	2.6
07-033-78	a550817.4325015.052018.684_E03.CEL	27.1663	16.6006	19.9449	3	34.5893	11.5197	25.6644	2.4	30.8778	14.0602	22.8046	2.7
07-033-20	a550817.4325015.052018.684_E10.CEL	23.8312	7.32439	2.22333	2.7	33.5267	12.5469	23.6057	2.6	28.679	9.93563	12.9145	2.65
07-033-77	a550817.4325015.052018.684_F01.CEL	34.5173	13.861	25.3825	2.1	44.5987	8.94752	28.8655	1.8	39.558	11.4042	27.124	1.95
07-033-53	a550817.4325015.052018.684_F03.CEL	-	-	-	-	39.423	10.7732	27.2365	2.6	39.423	10.7732	27.2365	2.6
07-033-11	a550817.4325015.052018.684_F07.CEL	40.9854	10.2601	26.3937	2	38.7108	10.32	25.9282	2.8	39.8481	10.29	26.1609	2.4
07-033-3	a550817.4325015.052018.684_F08.CEL	38.5598	10.4486	27.5649	2	37.9475	9.64253	27.5539	-	38.2537	10.0456	27.5594	2
07-033-76	a550817.4325015.052018.684_F11.CEL	30.099	14.1937	22.2001	2.9	38.936	10.3697	26.5242	2.6	34.5175	12.2817	24.3621	2.75
07-033-67	a550817.4325015.052018.684_G04.CEL	38.5447	10.2365	26.2856	2.2	41.6264	9.12885	27.8848	2.3	40.0855	9.68266	27.0852	2.25
07-033-82	a550817.4325015.052018.684_G08.CEL	31.9597	14.0532	22.8575	2.9	31.4161	13.3772	23.9481	3.2	31.6879	13.7152	23.4028	3.05
07-033-16	a550817.4325015.052018.684_H01.CEL	43.6902	7.67832	28.8887	1.7	41.5805	8.70756	28.1006	1.7	42.6353	8.19294	28.4946	1.7
06-033-105	a550817.4325015.052018.684_H10.CEL	35.6812	12.6593	23.9226	2.2	36.1649	10.3454	24.7277	2.5	35.923	11.5023	24.3252	2.35
06-033-96	a550817.4325015.052018.684_H11.CEL	39.4308	11.7171	25.7743	2	39.8202	10.537	28.1338	2.2	39.6255	11.1271	26.954	2.1
07-033-80	a550817.4325015.052018.684_H12.CEL	28.7197	15.9732	21.2014	2.7	37.9307	10.9718	27.5486	-	33.3252	13.4725	24.375	2.7
06-033-48	a550817.4325015.052018.686_A02.CEL	34.9937	12.1662	22.6743	2.3	38.5732	10.4633	27.6342	2.3	36.7835	11.3147	25.1543	2.3
06-033-56	a550817.4325015.052018.686_A03.CEL	34.7482	12.6067	23.6954	2.9	31.69	13.0562	23.8575	3	33.2191	12.8314	23.7764	2.95
06-033-81	a550817.4325015.052018.686_A05.CEL	35.494	12.1901	25.6977	2.5	38.6933	10.1808	29.3367	2.5	37.3521	10.874	27.5636	2.5
06-033-89	a550817.4325015.052018.686_A06.CEL	32.0691	14.7114	23.4982	2.9	38.7201	10.0356	27.1373	2.4	35.3946	12.3735	25.3177	2.65
06-033-1	a550817.4325015.052018.686_A07.CEL	29.273	14.1906	23.4	2.8	39.2402	9.15309	28.7326	2.2	34.2566	11.6719	26.0663	2.5
06-033-9	a550817.4325015.052018.686_A08.CEL	30.3945	14.7075	23.0056	2.8	37.2176	9.4248	27.4789	2.5	33.8061	12.0661	25.2422	2.65
06-033-25	a550817.4325015.052018.686_A09.CEL	31.6114	12.8636	22.5284	2.5	34.9331	11.0049	26.9184	2.5	33.2723	11.9343	24.7234	2.5
06-033-41	a550817.4325015.052018.686_A10.CEL	28.6487	13.5408	18.9085	2.9	29.4441	12.1985	21.6864	2.8	29.0464	12.8697	20.2974	2.85
06-033-49	a550817.4325015.052018.686_A11.CEL	22.281	7.59181	2.69481	-	41.6749	10.0661	28.3715	2.7	31.9779	8.82897	15.5332	2.7
06-033-73	a550817.4325015.052018.686_B01.CEL	28.9065	14.0707	17.7281	3	37.7979	10.2898	25.9413	2.4	33.3522	12.1803	21.8347	2.7
06-033-10	a550817.4325015.052018.686_B02.CEL	42.4037	9.30366	26.5786	2.3	44.412	8.33985	30.6942	1.3	43.4078	8.82175	28.6364	1.8
06-033-58	a550817.4325015.052018.686_B03.CEL	24.6628	6.7546	3.80467	2.2	39.8736	10.376	28.9817	2	32.2682	8.56529	16.3932	2.1
06-033-83	a550817.4325015.052018.686_B05.CEL	34.733	13.3307	22.0619	3	41.6596	8.70789	28.8522	2.3	38.1963	11.0193	25.4571	2.65
06-033-51	a550817.4325015.052018.686_B08.CEL	34.1536	13.4249	23.7072	2.42857	33.3625	12.6397	24.216	2.55556	33.758	13.0323	23.9616	2.49206
06-033-75	a550817.4325015.052018.686_B10.CEL	33.3988	13.1856	21.7722	2.8	36.0489	11.2936	25.5096	2.3	34.7238	12.2396	23.6409	2.55
06-033-4	a550817.4325015.052018.686_B12.CEL	40.4026	9.7639	27.585	1.7	39.4199	9.6605	28.738	2.3	39.9113	9.7122	28.1615	2
06-033-12	a550817.4325015.052018.686_C01.CEL	30.8069	14.3724	23.426	2.8	32.6322	11.9407	29.9063	2.66667	31.7196	13.1566	26.6661	2.73333
06-033-29	a550817.4325015.052018.686_C04.CEL	31.5883	13.2095	24.6917	2.55556	40.7925	9.29276	29.0169	2	36.1904	11.2511	26.8543	2.27778
06-033-45	a550817.4325015.052018.686_C05.CEL	29.8062	13.4146	20.0366	2.9	41.0479	9.65981	29.2253	2	35.427	11.5372	24.6309	2.45
06-033-61	a550817.4325015.052018.686_C06.CEL	31.9415	13.985	21.311	2.8	41.7634	9.81602	28.1396	2.11111	36.8525	11.9005	24.7253	2.45556
06-033-78	a550817.4325015.052018.686_C07.CEL	31.1087	12.1816	22.5996	2.625	37.6461	10.1639	26.2518	-	34.3774	11.1727	24.4257	2.625
03-002-9	a550817.4325015.052018.686_C10.CEL	42.9243	8.90879	27.4565	1.5	43.7178	8.05062	29.8349	1.3	43.3211	8.4797	28.6457	1.4
03-002-82	a550817.4325015.052018.686_D01.CEL	32.3608	13.5849	25.2633	2.66667	38.858	11.3713	27.3185	2.3	35.6094	12.4781	26.2909	2.48333
03-002-97	a550817.4325015.052018.686_D02.CEL	31.3514	14.7705	23.6326	2	38.9358	11.2089	27.4844	2	35.1436	12.9897	25.5585	2
03-002-24	a550817.4325015.052018.686_D07.CEL	40.817	10.1412	26.541	1.8	37.154	10.0133	27.2732	2.2	38.9855	10.0773	26.9071	2
03-002-38	a550817.4325015.052018.686_D08.CEL	35.8021	12.3148	26.0198	2.7	31.035	13.4514	23.8549	2.9	33.4186	12.8831	24.9373	2.8
03-002-50	a550817.4325015.052018.686_D09.CEL	31.2046	14.3635	23.8657	2.2	39.8375	9.08733	28.9408	1.5	35.5211	11.7254	26.4033	1.85
03-002-74	a550817.4325015.052018.686_D10.CEL	36.7923	11.7992	24.7437	2.1	38.2459	10.6505	27.0948	2.3	37.5191	11.2249	25.9192	2.2
03-002-98	a550817.4325015.052018.686_D12.CEL	40.8036	10.2145	27.1441	2	45.9093	8.47041	29.814	2	43.3565	9.34244	28.4791	2
03-002-27	a550817.4325015.052018.686_E05.CEL	34.6777	12.9586	24.6688	2.6	35.197	11.0646	25.5455	2.5	34.9374	12.0116	25.1072	2.55
03-002-15	a550817.4325015.052018.686_F01.CEL	30.635	13.5769	21.6765	2.9	30.5743	10.5817	22.3059	2.88889	30.6046	12.0793	21.9912	2.89444
03-002-30	a550817.4325015.052018.686_F02.CEL	32.0104	13.5058	24.0325	2.9	34.9518	10.9165	24.6018	2.9	33.4811	12.2111	24.3171	2.9
03-002-40	a550817.4325015.052018.686_F03.CEL	31.0036	14.0587	22.4655	2.83333	33.5467	11.2172	23.3456	3	32.2752	12.6379	22.9056	2.91667
03-002-101	a550817.4325015.052018.686_F07.CEL	22.5656	7.41149	3.35022	3	35.7576	11.6032	26.1632	2.5	29.1616	9.50734	14.7567	2.75
03-002-43	a550817.4325015.052018.686_G01.CEL	34.7758	13.0605	23.8093	1.9	42.8409	8.82136	28.5196	1.7	38.8083	10.941	26.1644	1.8
03-002-102	a550817.4325015.052018.686_G03.CEL	38.6802	11.5671	26.4123	2.2	38.7032	11.0208	27.5205	2.6	38.6917	11.294	26.9664	2.4
03-002-19	a550817.4325015.052018.686_G07.CEL	32.7948	13.0172	22.0789	2.5	32.0425	12.0267	23.7355	2.6	32.4187	12.522	22.9072	2.55
03-002-34	a550817.4325015.052018.686_G08.CEL	33.0097	11.1834	24.4742	2.6	36.0937	10.8951	26.6002	2.6	34.5517	11.0392	25.5372	2.6
03-002-44	a550817.4325015.052018.686_G09.CEL	35.5929	13.3329	25.5799	2.2	33.0861	10.5163	28.9922	2.4	34.3395	11.9246	27.286	2.3
03-002-58	a550817.4325015.052018.686_G10.CEL	28.7288	15.2183	21.1391	2.88889	29.6351	11.9035	24.4894	2.7	29.1819	13.5609	22.8143	2.79444
03-002-103	a550817.4325015.052018.686_G12.CEL	33.9876	13.1919	23.8682	2.4	37.4088	9.80913	28.936	2.6	35.6982	11.5005	26.4021	2.5
03-002-45	a550817.4325015.052018.686_H05.CEL	30.234	14.5599	21.2236	-	32.5398	11.5468	25.9872	2.4	31.3869	13.0534	23.6054	2.4
03-002-59	a550817.4325015.052018.686_H06.CEL	34.2124	13.7627	24.7913	1.9	37.9056	9.9678	27.2745	1.7	36.059	11.8653	26.0329	1.8
03-002-80	a550817.4325015.052018.686_H08.CEL	37.6188	10.6043	26.6693	2.3	32.7893	12.6715	25.5705	2.7	35.2041	11.6379	26.1199	2.5
05-011-84	a550817.4325015.052018.686_H10.CEL	38.9157	9.24032	27.4365	2.2	40.8279	8.41933	26.7581	-	39.8718	8.82982	27.0973	2.2
06-033-13	a550817.4325015.052018.687_G03.CEL	31.0835	14.0087	22.7889	3	30.9112	11.1743	25.5801	2.6	30.9974	12.5915	24.1845	2.8
06-033-84	a550817.4325015.052018.687_G05.CEL	34.3012	13.0825	22.3922	2.6	42.8618	8.1266	29.5182	2	38.5815	10.6046	25.9552	2.3
06-033-88	a550817.4325015.052018.688_F06.CEL	29.0618	14.9449	17.2227	2.9	30.3189	12.2801	21.6181	3	29.6903	13.6125	19.4204	2.95
06-033-2	a550817.4325015.052018.688_F07.CEL	30.3487	11.4318	21.5974	2.3	33.3438	10.8975	27.5293	2.5	31.8462	11.1646	24.5633	2.4
06-033-19	a550817.4325015.052018.688_F08.CEL	35.4812	11.5982	24.2057	2.5	40.3697	8.87225	29.4625	2.6	37.9255	10.2352	26.8341	2.55
06-033-52	a550817.4325015.052018.688_F09.CEL	31.6743	13.7194	21.6035	2.8	32.5376	12.8059	25.5667	2.9	32.1059	13.2626	23.5851	2.85
06-033-32	a550817.4325015.052018.688_G06.CEL	31.3967	12.6488	23.4867	3	39.1799	9.32147	27.5795	2	35.2883	10.9851	25.5331	2.5
06-033-27	a550817.4325015.052018.688_G08.CEL	27.052	13.4311	17.1117	3.1	37.2739	10.6032	27.6932	2.2	32.163	12.0171	22.4024	2.65
06-033-60	a550817.4325015.052018.688_G09.CEL	33.5238	12.0402	20.6622	-	28.1358	13.7702	20.4999	3	-	-	-	-
06-033-64	a550817.4325015.052018.688_H06.CEL	28.3123	16.1532	18.9891	3	34.2747	11.9879	24.719	2.3	31.2935	14.0706	21.8541	2.65
06-033-26	a550817.4325015.052018.688_H07.CEL	32.2877	10.486	20.205	2.4	37.1165	9.86015	27.6187	2.3	34.7021	10.1731	23.9118	2.35
06-033-35	a550817.4325015.052018.688_H08.CEL	35.4383	11.4828	24.1219	2.66667	38.2491	8.83955	27.1397	2.1	36.8437	10.1612	25.6308	2.38333
06-033-94	a550817.4325015.052018.688_H10.CEL	31.6471	14.0128	20.9341	3	38.9812	8.769	26.5573	2.6	35.3141	11.3909	23.7457	2.8
03-002-8	a550817.4325015.052018.690_A02.CEL	30.4138	13.6964	21.3813	2.7	43.6372	8.34482	30.1608	1.4	37.0255	11.0206	25.771	2.05
03-002-22	a550817.4325015.052018.690_A03.CEL	29.2068	11.9948	23.3316	2.9	30.9068	12.2934	22.6436	2.6	30.0568	12.1441	22.9876	2.75
03-002-36	a550817.4325015.052018.690_A04.CEL	28.7752	15.0261	21.803	2.9	37.6834	11.2468	27.4186	2.2	33.2293	13.1365	24.6108	2.55
03-002-46	a550817.4325015.052018.690_A05.CEL	33.7414	12.7779	24.837	2.7	29.8943	12.4706	25.3331	2.5	31.8178	12.6243	25.085	2.6
07-033-103	a550817.4325015.052018.690_C01.CEL	31.3833	13.9486	22.6764	2.5	39.2123	10.531	27.2901	2.2	35.2978	12.2398	24.9833	2.35
06-033-14	a550817.4325015.052018.692_G08.CEL	36.945	11.5761	26.9571	2.7	34.8799	10.1285	27.5934	2.5	35.9124	10.8523	27.2753	2.6
06-033-22	a550817.4325015.052018.692_G09.CEL	32.2996	12.9791	24.1396	2.1	32.0762	12.3928	26.3045	2.5	32.1879	12.686	25.222	2.3
06-033-46	a550817.4325015.052018.692_G10.CEL	29.9036	13.664	20.4884	2.7	34.8899	11.2105	26.2017	2.7	32.3967	12.4373	23.3451	2.7
06-033-87	a550817.4325015.052018.692_G12.CEL	27.7485	15.1709	15.7016	3.33333	43.3384	8.90364	28.6557	2.28571	35.0731	12.2749	22.0998	2.80952
06-033-15	a550817.4325015.052018.692_H02.CEL	27.7743	14.837	19.955	3	38.0943	9.72747	28.1911	2.2	32.9343	12.2822	24.073	2.6
06-033-31	a550817.4325015.052018.692_H03.CEL	41.4149	9.66502	26.3763	2	43.5882	7.87621	28.9233	2	42.5015	8.77061	27.6498	2
06-033-39	a550817.4325015.052018.692_H04.CEL	42.2073	9.17699	26.8313	2	33.0828	11.9887	24.5783	2.8	37.645	10.5829	25.7048	2.4
06-033-47	a550817.4325015.052018.692_H05.CEL	30.4075	14.5029	20.3052	2.8	38.6732	10.9078	28.4206	2.5	34.5404	12.7054	24.3629	2.65
06-033-55	a550817.4325015.052018.692_H06.CEL	35.5659	11.6371	23.5567	2.7	31.2282	12.8661	24.8108	3.2	33.397	12.2516	24.1838	2.95
06-033-71	a550817.4325015.052018.692_H07.CEL	36.6592	12.6004	23.532	2.14286	41.7382	9.10528	27.4303	2	39.1987	10.8528	25.4811	2.07143
06-033-80	a550817.4325015.052018.692_H08.CEL	37.0446	11.216	26.3805	2	38.5234	9.75043	26.1433	2.28571	37.5845	10.4503	26.255	2.14286
06-033-8	a550817.4325015.052018.692_H10.CEL	42.168	9.71757	27.8275	1.5	39.0894	10.2297	29.7723	1.9	40.6287	9.97364	28.7999	1.7
06-033-16	a550817.4325015.052018.692_H11.CEL	44.3575	8.77069	28.7045	2.4	34.2874	10.665	26.306	2.5	39.3225	9.71783	27.5052	2.45
06-033-24	a550817.4325015.052018.692_H12.CEL	31.229	11.771	20.5961	2.77778	36.1266	9.44365	25.6439	2.2	33.6778	10.6073	23.12	2.48889
06-033-34	a550817.4325015.052018.693_A07.CEL	29.9868	13.4779	21.8119	3	40.2519	8.66132	27.4025	2.1	35.1193	11.0696	24.6072	2.55
06-033-77	a550817.4325015.052018.693_A09.CEL	26.8737	9.24572	9.22212	3	38.5861	9.53895	24.4306	2.5	32.7299	9.39233	16.8263	2.75
03-002-23	a550817.4325015.052018.693_A10.CEL	31.3581	14.1479	21.4168	2.6	32.2974	11.4066	25.0472	2.3	31.8277	12.7772	23.232	2.45
06-033-30	a550817.4325015.052018.693_B05.CEL	32.1221	12.822	23.0404	2	40.5076	8.88364	27.6452	2	36.3148	10.8528	25.3428	2
06-033-42	a550817.4325015.052018.693_B07.CEL	29.9463	13.3353	20.3547	2.8	31.1037	12.7863	23.8529	2.8	30.525	13.0608	22.1038	2.8
06-033-20	a550817.4325015.052018.693_B08.CEL	31.2252	12.8909	22.7289	2.9	34.7489	10.1846	26.6374	2.3	32.9871	11.5377	24.6832	2.6
06-033-85	a550817.4325015.052018.693_B09.CEL	32.3127	14.5346	20.4111	3	34.926	11.0114	26.367	2.14286	33.3824	12.7781	23.2143	2.57143
06-033-54	a550817.4325015.052018.693_C04.CEL	39.9493	9.54654	24.4369	2	44.2062	8.59481	28.3665	2.1	42.0777	9.07067	26.4017	2.05
06-033-65	a550817.4325015.052018.693_C05.CEL	35.5654	12.4245	23.7059	2.9	33.8813	12.1416	24.4928	3	34.7233	12.283	24.0993	2.95
06-033-50	a550817.4325015.052018.693_C06.CEL	36.2043	12.1628	22.9028	2.2	40.3344	10.835	27.853	2.3	38.2693	11.4989	25.3779	2.25
06-033-28	a550817.4325015.052018.693_C07.CEL	37.8534	10.7693	25.1896	2.3	31.2916	12.4485	24.9379	2.7	34.5725	11.6089	25.0637	2.5
06-033-93	a550817.4325015.052018.693_C08.CEL	30.63	13.6922	20.4199	3.1	35.9412	10.4109	26.0213	2.6	33.2856	12.0516	23.2206	2.85
03-002-56	a550817.4325015.052018.693_C09.CEL	37.8519	11.2714	27.3239	1.9	43.6992	8.15056	30.6762	1.6	40.7756	9.71096	29.0001	1.75
06-033-82	a550817.4325015.052018.693_D05.CEL	41.1525	10.3454	26.8001	2.2	43.5907	7.93214	28.7034	2.2	42.3716	9.13879	27.7518	2.2
06-033-66	a550817.4325015.052018.693_D06.CEL	36.4243	12.6839	26.3811	2.1	39.7462	10.2125	28.3454	2.1	38.0852	11.4482	27.3633	2.1
06-033-36	a550817.4325015.052018.693_D07.CEL	26.3748	14.7333	18.186	3.1	29.5754	12.7779	23.8497	2.8	27.9751	13.7556	21.0179	2.95
03-002-70	a550817.4325015.052018.693_D09.CEL	33.4245	14.3868	23.9082	2	32.3125	10.9003	26.6074	2.2	32.8685	12.6436	25.2578	2.1
06-033-63	a550817.4325015.052018.693_E04.CEL	26.6604	14.4865	15.7501	3	28.9149	13.663	20.2396	3	27.7877	14.0747	17.9948	3
06-033-90	a550817.4325015.052018.693_E05.CEL	38.5202	11.3503	26.8537	2	43.7633	8.14187	28.2431	2	41.1417	9.74606	27.5484	2
06-033-91	a550817.4325015.052018.693_E06.CEL	30.7671	14.4697	22.3103	2.7	35.5597	12.1396	27.4894	2.3	33.1634	13.3047	24.8999	2.5
06-033-44	a550817.4325015.052018.693_E07.CEL	36.1785	11.586	24.4641	2	33.6268	11.1549	25.0153	2.7	34.9026	11.3705	24.7397	2.35
06-033-53	a550817.4325015.052018.693_E08.CEL	29.8842	12.9689	20.8512	2.8	31.0358	12.7141	23.7907	2.8	30.46	12.8415	22.3209	2.8
07-033-61	a550817.4325016.052018.798_A12.CEL	30.2848	13.639	23.3647	2.9	36.9383	11.2784	26.4854	2.7	33.6116	12.4587	24.925	2.8
06-033-97	a550817.4325016.052018.799_G10.CEL	38.6382	12.3474	25.5548	2	39.4378	10.2967	27.2337	2	39.038	11.322	26.3942	2
07-033-92	a550817.4345742.120218.220_A02.CEL	25.553	7.69894	4.34573	3	33.8994	10.8952	26.1122	3	29.7262	9.29706	15.2289	3
07-033-95	a550817.4345742.120218.220_B02.CEL	27.4442	14.0351	19.6359	3	30.0939	12.6226	22.6232	3	28.7691	13.3289	21.1295	3
07-033-97	a550817.4345742.120218.220_C02.CEL	27.79	15.1428	18.3123	3	32.8988	12.2544	25.7569	3	30.3444	13.6986	22.0346	3
07-033-79	a550817.4345742.120218.220_D01.CEL	35.9853	12.2766	24.3585	2.6	40.1722	9.13843	27.5511	2.2	38.0787	10.7075	25.9548	2.4
07-033-83	a550817.4345742.120218.220_E01.CEL	25.1835	16.3221	16.9566	3.2	25.4389	14.8751	19.7084	2.9	25.3112	15.5986	18.3325	3.05
07-033-39	a550817.4345742.120218.220_F09.CEL	49.3231	5.88686	27.7827	1	43.5014	9.40076	29.6492	2	46.4122	7.64381	28.716	1.5
07-033-15	a550817.4345742.120218.221_B02.CEL	-	-	-	-	37.8972	10.0885	25.4765	2.1	37.8972	10.0885	25.4765	2.1
07-033-98	a550817.4345742.120218.221_C02.CEL	35.1368	13.697	24.5729	2.9	40.4489	9.48314	26.3319	2.5	37.7928	11.5901	25.4524	2.7
03-002-17	a550817.4345742.120218.222_E01.CEL	35.8433	12.0493	24.9904	2	45.7165	7.38732	30.2281	1.2	40.7799	9.71829	27.6093	1.6
03-002-21	a550817.4345742.120218.222_E02.CEL	36.3641	12.9489	25.3845	2	33.2195	12.436	24.3801	2.6	34.7918	12.6925	24.8823	2.3
03-002-35	a550817.4345742.120218.222_E03.CEL	26.7253	7.37565	5.50948	-	38.9084	10.187	28.2261	-	32.8169	8.78135	16.8678	-
05-011-86	a550817.4345742.120218.222_E08.CEL	28.5441	13.3229	21.1786	3	32.4471	12.0243	22.375	2.375	30.4956	12.6736	21.7768	2.6875
05-011-87	a550817.4345742.120218.222_E09.CEL	40.2643	9.73457	29.1937	2	34.7686	11.6	25.3022	2.7	37.5165	10.6673	27.248	2.35
06-033-5	a550817.4345742.120218.222_E11.CEL	41.0258	10.2526	28.4608	2	38.0474	9.64549	28.0582	2.4	39.5366	9.94907	28.2595	2.2
06-033-6	a550817.4345742.120218.222_E12.CEL	37.899	11.6939	27.1529	2.1	37.1752	10.8604	28.239	2	37.5371	11.2772	27.6959	2.05
06-033-18	a550817.4345742.120218.222_F01.CEL	39.797	10.5777	26.2266	2.2	44.5909	7.81626	30.9847	2	42.1939	9.19698	28.6056	2.1
06-033-37	a550817.4345742.120218.222_F02.CEL	38.2015	11.1964	25.919	2.7	42.4847	8.07238	27.9614	2	40.3431	9.6344	26.9402	2.35
06-033-68	a550817.4345742.120218.222_F03.CEL	30.0601	14.7301	20.1494	3	34.4605	11.0235	23.9726	2.66667	32.2603	12.8768	22.061	2.83333
06-033-69	a550817.4345742.120218.222_F04.CEL	32.0445	13.2768	21.2424	2.75	33.7644	11.4292	23.859	3	32.9045	12.353	22.5507	2.875
06-033-86	a550817.4345742.120218.222_F06.CEL	42.351	11.5133	25.8665	2	43.8995	8.61278	29.1405	2	43.3184	10.0361	27.6813	2
07-033-1	a550817.4345742.120218.222_F08.CEL	35.7426	12.2492	26.6493	2.44444	34.3542	12.0277	24.5414	2.88889	34.8944	12.1669	25.481	2.66667
07-033-2	a550817.4345742.120218.222_F09.CEL	40.6408	8.63472	27.0616	2.33333	34.6572	11.867	25.4819	3	37.649	10.2509	26.2717	2.66667
07-033-7	a550817.4345742.120218.222_F11.CEL	37.4714	12.3884	26.726	2	33.6555	12.0081	26.4176	2.8	35.5635	12.1982	26.5718	2.4
07-033-8	a550817.4345742.120218.222_F12.CEL	35.8457	12.8933	25.2431	2	32.0541	12.854	26.5802	2.6	33.9499	12.8737	25.9117	2.3
07-033-10	a550817.4345742.120218.222_G01.CEL	23.7546	7.01477	2.65762	2.3	39.4747	9.26448	28.2432	2.2	31.6147	8.13963	15.4504	2.25
07-033-12	a550817.4345742.120218.222_G02.CEL	31.3577	13.7215	21.9004	3	32.4078	13.194	24.0882	2.9	31.8827	13.4578	22.9943	2.95
07-033-19	a550817.4345742.120218.222_G04.CEL	33.1252	14.0467	24.1562	3	36.1061	10.3921	24.3519	2.5	34.6157	12.2194	24.2541	2.75
07-033-21	a550817.4345742.120218.222_G05.CEL	33.1851	13.494	23.2937	2.9	37.1544	10.8687	25.9336	2.2	35.1697	12.1814	24.6137	2.55
07-033-22	a550817.4345742.120218.222_G06.CEL	34.9715	13.3165	25.581	2.7	41.5771	10.0766	29.5083	2.5	38.2743	11.6965	27.5446	2.6
07-033-36	a550817.4345742.120218.222_G11.CEL	32.1707	14.4376	25.3557	3.2	45.2847	7.45479	28.6275	1.7	38.7277	10.9462	26.9916	2.45
